# Supplementary material for: Unique Transcriptome Patterns of the White and Grey Matter Corroborate Structural and Functional Heterogeneity in the Human Frontal Lobe
Source: PLoS One. 2013 Oct 23;8(10):e78480. doi: 10.1371/journal.pone.0078480 (PMC3808538; doi:10.1371/journal.pone.0078480)
Supplement: Table S1 — Full list of significant DEGs between GM and WM. (XLSX) [file pone.0078480.s001.xlsx]

## Sheet: Sheet1
Table S1: Full list of significant DEGs between GM and WM.
GENE	CHROMOSOME	FPKM GM	FPKM WM	FOLD CHANGE	Q VALUE	SIGNIFICANT
CBLN4	chr20:54571631-54580448	9.98418	0.0288865	-345.635	0.00290815	yes
ONECUT2	chr18:55102916-55158530	0.48126	0.0015143	-317.81	0.000621056	yes
-	chr10:10661283-10666674	1.04349	0.00475891	-219.271	0.0473629	yes
KCNS2	chr8:99400306-99455384	1.56421	0.00718485	-217.709	4.20053e-06	yes
-	chr11:109300698-109305064	0.760934	0.0035371	-215.129	0.0177173	yes
SDR16C5	chr8:57212569-57233241	1.46311	0.00753222	-194.247	0.0200461	yes
KIAA1239	chr4:37246689-37451087	1.12395	0.00660563	-170.15	0.000270041	yes
OPRK1	chr8:54138061-54164194	0.960024	0.00589279	-162.915	0.0421284	yes
-	chr5:26869235-26877416	0.628546	0.00413682	-151.939	0.0281629	yes
GLRA3	chr4:175557837-175750499	1.31853	0.00902946	-146.025	0.000379934	yes
C1QL3	chr10:16478966-16565351	6.69439	0.0476218	-140.574	0.00597669	yes
-	chr17:16915228-16918276	2.88395	0.0245143	-117.644	0.00298648	yes
FLJ41278	chr12:65277553-65371302	1.74655	0.0150581	-115.987	0.000318564	yes
SLC17A6	chr11:22359666-22401191	2.44851	0.0226146	-108.271	0.00269117	yes
-	chr14:85984315-85991028	0.674889	0.00633027	-106.613	0.0222145	yes
KCNC1	chr11:17757494-17804735	15.4838	0.145305	-106.561	4.52362e-05	yes
GABRA4	chr4:46920916-46996424	3.46748	0.0333119	-104.091	9.24297e-11	yes
ANO3	chr11:26331188-26684877	4.00359	0.0391966	-102.141	6.03495e-07	yes
HCN1	chr5:45255051-45696220	4.89906	0.0508991	-96.2504	1.08741e-12	yes
C11orf87	chr11:109292845-109299893	10.5744	0.111893	-94.5046	9.60181e-10	yes
KCNQ5	chr6:73331570-73908573	10.204	0.121123	-84.2449	0.00373304	yes
-	chr21:38979673-38989360	8.16357	0.0983653	-82.9924	0.000416761	yes
HTR5A	chr7:154858778-154879102	2.81444	0.0339874	-82.8083	0.000207245	yes
SLC4A10	chr2:162480844-162841786	20.9199	0.254748	-82.12	2.23897e-05	yes
ZMAT4	chr8:40388106-40755343	6.91622	0.0871534	-79.3569	0.00117618	yes
WIF1	chr12:65444403-65515346	10.3554	0.130596	-79.2934	1.28497e-08	yes
-	chrUn_gl000227:108455-113843	2.07748	0.0270454	-76.8145	0.00261975	yes
KCNV1	chr8:110975540-110988012	5.06427	0.0667454	-75.8744	2.7016e-10	yes
-	chr10:10787462-10800734	1.38082	0.0182043	-75.8513	0.0368533	yes
GABRB2	chr5:160715425-160975130	20.3926	0.272668	-74.7891	2.3053e-11	yes
-	chr18:14990733-14996105	0.713095	0.00955254	-74.6498	0.0219924	yes
NEFL	chr8:24808465-24814131	204.57	2.89839	-70.5806	1.00422e-06	yes
EMX1	chr2:73144603-73163821	7.45497	0.106449	-70.0333	2.09681e-05	yes
KIAA0748	chr12:55341805-55378456	37.3757	0.53375	-70.0247	8.52906e-10	yes
-	chr1:71861631-71862611	12.8854	0.184572	-69.8123	4.12981e-05	yes
SLC6A7	chr5:149569500-149591004	13.2389	0.192258	-68.8601	9.26844e-08	yes
-	chr12:128399826-128436000	6.69821	0.0981097	-68.2727	0.000819436	yes
GABRA1	chr5:161274196-161326979	24.953	0.370657	-67.321	6.05576e-06	yes
CTXN3	chr5:126984712-126994322	9.10595	0.136397	-66.7606	1.44611e-06	yes
RGS4	chr1:163038395-163046592	100.747	1.51523	-66.4896	1.83915e-07	yes
-	chr1:148674612-148676584	1.81932	0.027523	-66.1018	0.0295811	yes
HAPLN4	chr19:19365431-19373596	29.43	0.445328	-66.0861	1.69152e-11	yes
MIR378D1	chr4:5899159-5990532	2.19651	0.0338917	-64.8097	2.20054e-08	yes
NEUROD6	chr7:31377079-31380538	14.2479	0.220704	-64.5566	8.84081e-07	yes
OLFM3	chr1:102263377-102462790	10.7935	0.169055	-63.8461	1.67259e-08	yes
CACNA1I	chr22:39966757-40085786	8.58166	0.135464	-63.3501	0.00859669	yes
KCNT1	chr9:138585250-138687338	10.8122	0.175739	-61.5242	0.0030225	yes
-	chr3:159936894-159941505	0.754601	0.0123242	-61.2292	0.0222053	yes
NEFH	chr22:29876180-29887279	57.7636	0.94719	-60.9842	9.98096e-09	yes
GABRG2	chr5:161488872-161582662	25.6725	0.424645	-60.4564	1.67998e-09	yes
GREM2	chr1:240652872-240775462	1.77202	0.0299472	-59.1715	0.0205401	yes
SYT1	chr12:79257772-79845790	87.9017	1.49415	-58.8306	0.000873923	yes
RBFOX1	chr16:6069131-7763340	34.9449	0.594301	-58.8	2.38119e-09	yes
SYT4	chr18:40847856-40857615	22.5049	0.389743	-57.7429	0	yes
CBLN2	chr18:70200978-70305723	20.3491	0.353072	-57.6344	2.20517e-07	yes
C11orf41	chr11:33398369-33695648	17.9839	0.316884	-56.7523	0.000508621	yes
ATP2B2	chr3:10365698-10749641	22.7398	0.400828	-56.7321	0.00199046	yes
RXFP1	chr4:159442865-159574521	5.17544	0.0923615	-56.0346	0.000764641	yes
MAL2	chr8:120220292-120257914	23.2666	0.417107	-55.7809	1.70914e-07	yes
GALNT9	chr12:132680916-132905905	26.5525	0.476634	-55.7084	2.09681e-05	yes
ELAVL4	chr1:50513685-50669455	22.3087	0.401369	-55.5815	8.79775e-09	yes
GJB6	chr13:20796100-20806534	23.2282	0.421211	-55.1462	1.11848e-10	yes
CACNG3	chr16:24266873-24373737	23.1601	0.421048	-55.0058	1.44305e-10	yes
INA	chr10:105036904-105050108	65.1508	1.1864	-54.9147	4.34963e-12	yes
NEFM	chr8:24771273-24776606	224.012	4.08615	-54.8223	1.27027e-06	yes
CAMK1G	chr1:209757044-209787284	21.8126	0.404999	-53.8584	0.000116022	yes
SLC30A3	chr2:27476253-27485960	20.5387	0.383428	-53.566	1.98714e-07	yes
STAT4	chr2:191894301-192016322	8.07107	0.151145	-53.3995	4.8154e-08	yes
FAM153B	chr5:175476692-175554134	7.26221	0.136232	-53.3077	0.0322859	yes
FAM153C	chr5:177433966-177476088	2.67347	0.0510291	-52.3911	0.0412036	yes
CHRM3	chr1:239550243-240078851	3.37735	0.0647611	-52.1509	7.88938e-09	yes
ENC1	chr5:73923230-73937249	99.6756	1.9228	-51.8388	0.0032341	yes
MAP7D2	chrX:20024828-20135114	17.8737	0.351289	-50.8803	2.45969e-08	yes
SPTSSB	chr3:161062579-161089871	10.6398	0.209438	-50.8017	1.36588e-05	yes
KCNC2	chr12:75433895-75603630	19.4689	0.389298	-50.0103	8.36633e-06	yes
MIR124-2	chr8:65291705-65300515	8.29462	0.166806	-49.7261	0	yes
LOC151009,LOC440894	chr2:111132685-111142113	44.8343	0.905806	-49.4966	1.468e-11	yes
ST6GALNAC5	chr1:77333076-77536164	9.02134	0.182827	-49.3436	0.000760518	yes
LOC100507050	chr11:74951949-74954749	1.67563	0.0340177	-49.2576	0.010746	yes
GABBR2	chr9:101050363-101471479	50.7772	1.03239	-49.1841	2.54447e-08	yes
-	chr7:145694425-145694527	76082.8	1550.07	-49.0835	8.43881e-07	yes
MAP2	chr2:210288770-210599607	73.4393	1.49753	-49.0403	0.0490218	yes
MIR4500HG	chr13:88096241-88324307	1.59629	0.0331416	-48.1657	0.0345805	yes
GPR83	chr11:94110476-94134681	1.66692	0.0347548	-47.9623	0.0147876	yes
-	chr8:1282873-1287524	1.04758	0.0218597	-47.9229	0.00629158	yes
SH2D5	chr1:21046222-21059133	14.0219	0.292942	-47.8658	0.0229789	yes
VSTM2L	chr20:36531498-36573753	57.8221	1.20866	-47.8398	3.17794e-06	yes
SOWAHB	chr4:77814686-77819303	2.73557	0.0579536	-47.2028	0.000806885	yes
LOC100507043	chr14:96343108-96391908	5.83372	0.123664	-47.174	6.59413e-08	yes
GRM1	chr6:146348781-146758731	1.93385	0.0416337	-46.4492	4.27065e-05	yes
SOSTDC1	chr7:16500215-16505854	2.73207	0.0592711	-46.0945	0.00031417	yes
-	chr6:80663465-80663566	27372.5	606.7	-45.117	0.0118971	yes
LOC440894	chr2:110744556-110752858	13.0312	0.290248	-44.8968	0.00149153	yes
-	chr6:170773516-170777877	1.29541	0.0288628	-44.8816	0.00206524	yes
ICAM5	chr19:10400590-10407455	10.0551	0.227205	-44.2556	0.0033853	yes
CAMK2A	chr5:149599053-149669403	233.16	5.27306	-44.2172	0.000508621	yes
RAB3C	chr5:57878904-58155306	11.2307	0.256739	-43.7436	1.11848e-10	yes
CUX2	chr12:111471827-111788358	4.27919	0.0998403	-42.8603	2.15601e-09	yes
ANKRD20A5P,CYP4F35P	chr18:14179095-14342524	3.85489	0.0905864	-42.5548	0.00476357	yes
CNTN4	chr3:2140549-3100827	5.25252	0.124263	-42.2694	0.00235914	yes
TIAM2	chr6:155411422-155635617	9.09077	0.217452	-41.8059	0.045289	yes
PRMT8	chr12:3490514-3703138	9.54392	0.228954	-41.6849	0.000108699	yes
KCNA1	chr12:5019072-5027594	12.35	0.296928	-41.5926	0.0238096	yes
-	chr20:41818748-41831300	3.55179	0.0855722	-41.5064	0.00237504	yes
-	chr20:62948153-62959366	0.479698	0.0115695	-41.4623	0.00172679	yes
CDK5R2	chr2:219824397-219826877	29.9041	0.722912	-41.3662	3.73033e-10	yes
PCDH8	chr13:53417484-53422778	6.6906	0.161758	-41.3618	1.00889e-06	yes
LOC440896	chr9:69174206-69181078	4.38355	0.106732	-41.0706	0.00150401	yes
HTR2A	chr13:47405676-47471211	7.73663	0.188642	-41.0122	4.07284e-11	yes
PRKCG	chr19:54385466-54410901	24.5304	0.59895	-40.9557	2.79181e-09	yes
-	chrX:12070236-12072823	0.975733	0.0239578	-40.7272	0.0495713	yes
SYN2	chr3:12045861-12233532	48.9656	1.20229	-40.7269	1.15881e-07	yes
HOOK1	chr1:60239719-60342180	3.37139	0.0829539	-40.6417	0.00196871	yes
RAB27B	chr18:52385115-52562885	4.91824	0.12158	-40.4527	0.0232359	yes
-	chr6:166293353-166295977	0.713848	0.0178306	-40.035	0.037608	yes
-	chr3:191284238-191309306	0.994183	0.025034	-39.7133	0.0349115	yes
SULT4A1	chr22:44220386-44258378	91.8982	2.32334	-39.5543	6.01454e-07	yes
DNM1	chr9:130928343-131017527	237.934	6.04362	-39.3695	0.00864338	yes
CHGA	chr14:93389444-93401638	110.784	2.82308	-39.2422	3.47212e-08	yes
PVALB	chr22:37196744-37215517	74.7449	1.90701	-39.1948	1.10626e-09	yes
SLC12A5	chr20:44650328-44688789	31.4802	0.808493	-38.9369	1.17054e-08	yes
MEPE	chr4:88742562-88767968	2.19306	0.0564171	-38.8723	0.0179486	yes
STYK1	chr12:10771537-10826891	1.72034	0.0443007	-38.8332	0.0373204	yes
-	chr7:101005641-101234957	7.38381	0.190483	-38.7636	0.0117318	yes
TRHDE	chr12:72647286-73067528	3.04063	0.0791912	-38.3961	0.00370015	yes
FAM19A1	chr3:68040733-68596459	6.98989	0.182097	-38.3855	7.30193e-06	yes
UNC5D	chr8:35092974-35654102	1.49642	0.0393698	-38.0093	1.72715e-07	yes
GABRD	chr1:1950767-1962197	52.3944	1.39626	-37.5248	2.23184e-05	yes
RIMS3	chr1:41084718-41132388	46.2879	1.26013	-36.7326	9.77664e-07	yes
SLC17A7	chr19:49932625-49944808	270.786	7.39504	-36.6172	0.000404205	yes
SCRT1	chr8:145553313-145559943	25.754	0.706546	-36.4506	1.83693e-07	yes
CCKBR	chr11:6280903-6293357	9.52802	0.262738	-36.2643	6.41504e-06	yes
PTPN5	chr11:18749472-18813389	34.2243	0.946016	-36.1773	1.01039e-05	yes
KCNS1	chr20:43720949-43729755	14.0255	0.388042	-36.1443	1.468e-11	yes
SYT13	chr11:45261852-45307884	18.2506	0.505018	-36.1385	1.468e-11	yes
RGS7BP	chr5:63801884-63910496	10.876	0.306695	-35.4619	1.08741e-12	yes
-	chr8:73859183-73862855	1.28958	0.0363749	-35.4525	0.00324336	yes
SYNPR	chr3:63263913-63602607	35.3072	1.00015	-35.3019	1.1368e-09	yes
CHD5	chr1:6161844-6240194	19.8311	0.568424	-34.8879	7.19655e-07	yes
SYT2	chr1:202559461-202679551	20.7415	0.598058	-34.6814	0.000208051	yes
D4S234E	chr4:4387982-4543775	27.5338	0.794353	-34.6619	0.0297296	yes
-	chr22:32720282-32727500	0.707996	0.0204642	-34.5968	0.00171946	yes
HIPK4	chr19:40885177-40896094	1.93207	0.0559321	-34.5431	0.00855724	yes
-	chr14:66367527-66367623	105389	3064.16	-34.3941	0.00346917	yes
SYT7	chr11:61281187-61348344	19.6347	0.576387	-34.0651	3.13826e-10	yes
VSNL1	chr2:17721806-17837706	443.144	13.11	-33.802	0.00105664	yes
FGF9	chr13:22245214-22278690	3.20751	0.0949572	-33.7785	0.000769507	yes
TAC1	chr7:97361270-97369784	11.603	0.343636	-33.7654	0.000110606	yes
ADCYAP1	chr18:904943-912173	3.76037	0.111371	-33.7644	0.0172237	yes
ELAVL2	chr9:23690100-23826324	13.9888	0.41437	-33.7592	2.68486e-08	yes
GAD1	chr2:171673199-171717659	34.5721	1.02625	-33.6878	0.000612035	yes
FSTL4	chr5:132529089-132948223	3.24525	0.0966755	-33.5685	1.51324e-08	yes
NDST3	chr4:118955490-119179789	1.6531	0.0493197	-33.518	0.0282351	yes
SH3GL2	chr9:17578952-17797122	59.566	1.78116	-33.4423	6.306e-08	yes
SLITRK4	chrX:142710593-142723926	6.25174	0.187975	-33.2584	3.87262e-09	yes
NEUROD2	chr17:37760020-37764175	23.1437	0.701938	-32.9711	3.13826e-10	yes
EPHX4	chr1:92495532-92529289	9.9257	0.301263	-32.947	0.000110482	yes
PACSIN1	chr6:34433852-34504040	69.5014	2.12188	-32.7546	0.000965717	yes
CACNB2	chr10:18429605-18830688	7.53084	0.230066	-32.7334	0.0238096	yes
-	chr14:63166189-63171372	2.59656	0.0800015	-32.4564	5.66677e-06	yes
CELF4	chr18:34822878-35146000	46.8993	1.45042	-32.335	8.89672e-09	yes
ITPR1	chr3:4535031-4898627	31.3112	0.968902	-32.3162	2.07561e-08	yes
-	chr2:42653287-42657412	0.858442	0.0268501	-31.9717	0.0142096	yes
CA7	chr16:66878281-66888049	5.29668	0.16581	-31.9443	0.00265793	yes
CALB1	chr8:91070837-91095107	4.92091	0.1545	-31.8506	5.66677e-06	yes
LOC440040	chr11:49580079-49831969	3.88378	0.122075	-31.8147	0.0134493	yes
LOC100507588	chr19:7981031-7983980	8.69581	0.273834	-31.7558	7.18297e-05	yes
CHRNB2	chr1:154540256-154553737	6.10355	0.194676	-31.3523	1.14119e-08	yes
-	chr9:27937650-27946577	1.06488	0.0340469	-31.2769	0.00116955	yes
KCNJ4	chr22:38822332-38851203	34.8137	1.1141	-31.2483	2.95222e-08	yes
RALYL	chr8:85095452-85834078	23.9187	0.769955	-31.0651	1.01039e-05	yes
MGAT5B	chr17:74864797-74946475	17.4688	0.569484	-30.6748	9.60181e-10	yes
CYP4X1	chr1:47489239-47516423	8.65563	0.28335	-30.5475	0.00276974	yes
UNC13A	chr19:17712009-17799008	21.0627	0.692295	-30.4245	1.49154e-06	yes
NPTX1	chr17:78440631-78450404	33.6268	1.11107	-30.2652	1.57088e-09	yes
MIAT	chr22:27053257-27072492	43.211	1.43143	-30.1873	1.57786e-07	yes
ST8SIA3	chr18:55019720-55036210	14.6083	0.488809	-29.8855	2.8212e-08	yes
SRRM4	chr12:119419299-119600856	7.20138	0.241608	-29.806	1.10626e-09	yes
CPLX2	chr5:175223609-175311024	125.409	4.21407	-29.7596	3.05506e-05	yes
CAMKV	chr3:49895421-49907369	35.7859	1.20528	-29.6909	1.31939e-10	yes
MEG3	chr14:101292444-101327368	44.4994	1.50052	-29.656	0.00708856	yes
CDH18	chr5:19466798-19988353	5.18478	0.175677	-29.5131	0.00114715	yes
KIAA1644	chr22:44639543-44727414	6.42321	0.219896	-29.2102	2.80233e-09	yes
RBFOX3	chr17:77085426-77606858	40.4524	1.38489	-29.2098	5.66677e-06	yes
SCN2A	chr2:166095911-166254537	28.6438	0.984148	-29.1052	8.89672e-09	yes
CNTN5	chr11:98891705-100229643	0.836438	0.0288091	-29.0338	0.00505475	yes
FAM19A2	chr12:62102028-62586620	8.01334	0.276657	-28.9649	1.70324e-05	yes
EMID2	chr7:101005641-101234957	7.62811	0.265634	-28.7166	0.000108535	yes
CABLES1	chr18:20714527-20840434	23.3594	0.814377	-28.6838	1.56193e-09	yes
FGF13	chrX:137713733-138287185	18.639	0.64986	-28.6816	6.01454e-07	yes
PLXNA4	chr7:131808090-132333447	3.05545	0.106826	-28.6021	1.28021e-08	yes
KCNA4	chr11:30028116-30038577	0.983433	0.0345015	-28.5041	0.0297532	yes
ELMOD1	chr11:107461816-107537505	19.7846	0.696457	-28.4075	7.51498e-10	yes
-	chr1:14741670-14746232	1.59915	0.0566507	-28.2282	0.000503789	yes
CPNE9	chr3:9745509-9771592	9.7581	0.35001	-27.8795	6.71279e-06	yes
SSTR3	chr22:37600275-37608468	2.7737	0.0997696	-27.8011	3.75561e-05	yes
PTPRN	chr2:220154342-220174295	57.2544	2.06588	-27.7143	0.00011995	yes
CHRM1	chr11:62675315-62689012	17.648	0.638692	-27.6315	4.06371e-06	yes
MYT1L	chr2:1792884-2335045	20.5189	0.745038	-27.5407	8.43881e-07	yes
B4GALT6	chr18:29201111-29268610	9.2692	0.33819	-27.4083	4.11473e-07	yes
PCSK1	chr5:95726039-95768985	10.2146	0.37294	-27.3894	5.89196e-06	yes
CABP1	chr12:121067300-121105192	270.624	9.8955	-27.3482	4.07503e-05	yes
ROBO2	chr3:77089293-77699114	3.77391	0.138249	-27.2979	0.00219522	yes
PCSK2	chr20:17206751-17465222	11.0276	0.407363	-27.0707	7.18843e-06	yes
EGR3	chr8:22545173-22560266	6.28553	0.232234	-27.0655	0.00778445	yes
IQSEC3	chr12:176048-287625	14.966	0.554819	-26.9746	1.01039e-05	yes
LOC158696	chrX:137696891-137699799	2.86787	0.106394	-26.9552	6.18517e-05	yes
SLC2A13	chr12:40148822-40499661	8.93248	0.331577	-26.9394	7.98592e-09	yes
-	chr14:71276649-71284038	1.68715	0.0629326	-26.8088	0.00339021	yes
HOMER1	chr5:78668798-78809986	6.83501	0.256103	-26.6885	6.73606e-06	yes
ZNF385B	chr2:180306707-180726232	8.75884	0.329548	-26.5783	0.0010123	yes
TTC39A	chr1:51752929-51810785	1.87046	0.0704045	-26.5673	0.0154725	yes
LOC100128264	chr7:154858778-154879102	3.03291	0.114188	-26.5607	0.012368	yes
SNCB	chr5:176047209-176057557	339.807	12.8204	-26.5052	6.30415e-05	yes
CLVS2	chr6:123317408-123394492	3.6436	0.13806	-26.3914	8.13256e-08	yes
FRAS1	chr4:78978723-79465556	0.756768	0.0287047	-26.3639	0.00157464	yes
-	chr2:222437174-222441314	0.822057	0.0312662	-26.2922	0.0417741	yes
RFPL2	chr22:32586421-32600789	3.61919	0.137674	-26.2881	0.0264864	yes
NGB	chr14:77731833-77737655	10.0108	0.381165	-26.2637	0.00195899	yes
PHYHIP	chr8:22077209-22089851	122.193	4.68579	-26.0774	0.000200705	yes
CLEC2L	chr7:139208673-139229731	30.1045	1.15592	-26.0438	0.000334794	yes
ODZ2	chr5:166711842-167696338	2.27786	0.0875694	-26.0121	9.10282e-05	yes
PTPRT	chr20:40701391-41818557	11.0577	0.426661	-25.9168	0.00553195	yes
C3orf80	chr3:159943422-159947504	8.91705	0.345427	-25.8146	2.25209e-06	yes
FGF12	chr3:191857181-192445388	15.0736	0.584377	-25.7943	1.7626e-09	yes
DLGAP1	chr18:3494455-4455266	27.5974	1.07783	-25.6046	0.000417897	yes
HECW1	chr7:43152197-43605703	4.77014	0.18637	-25.595	3.82843e-06	yes
SLC6A17	chr1:110693131-110744823	20.6525	0.807077	-25.5893	4.55692e-07	yes
GLS2	chr12:56862300-56882181	11.2476	0.440407	-25.5391	0.0128047	yes
COL19A1	chr6:70576397-70924747	0.626629	0.0247253	-25.3436	3.95496e-05	yes
CRYM	chr16:21269838-21329912	69.1727	2.73528	-25.2891	4.53528e-08	yes
ATRNL1	chr10:116853123-117708666	12.2339	0.486624	-25.1404	8.79775e-09	yes
-	chr12:132906287-132912657	4.34672	0.173253	-25.0889	0.0141402	yes
GABRA5	chr15:27111865-27194357	17.0333	0.680329	-25.0369	2.64892e-08	yes
INSM2	chr14:36003247-36006260	0.893439	0.0358127	-24.9475	0.0292173	yes
DPY19L2P1	chr7:35119320-35225774	2.83146	0.113741	-24.8939	0.00129037	yes
TBR1	chr2:162272619-162282400	22.6355	0.909907	-24.8767	1.15881e-07	yes
PARM1	chr4:75858284-75975325	11.5221	0.463169	-24.8767	9.59638e-10	yes
CKMT1A,CKMT1B	chr15:43825354-43991420	91.4334	3.6755	-24.8765	0.0306892	yes
PGM2L1	chr11:74041230-74109502	20.0715	0.80716	-24.8668	0.00673599	yes
-	chr12:3402164-3406122	0.618908	0.0248974	-24.8583	0.0462721	yes
ZNF804A	chr2:185463092-185804221	1.37324	0.0554153	-24.7809	0.00498503	yes
MARCH4	chr2:217122584-217236750	1.96149	0.0792961	-24.7363	0.0120657	yes
UBE2QL1	chr5:6448735-6496834	13.9964	0.567841	-24.6484	1.3647e-10	yes
RTN4RL1	chr17:1837970-1928178	4.80909	0.195515	-24.597	7.00348e-06	yes
PLCB1	chr20:8113295-8865547	14.0201	0.572918	-24.4714	5.53255e-09	yes
PTER	chr10:16478966-16565351	7.35582	0.300869	-24.4486	7.85025e-05	yes
KCNA3	chr1:111196290-111217655	1.04687	0.0430852	-24.2977	0.00804089	yes
-	chr17:36905624-36907985	0.961907	0.040019	-24.0363	0.0398675	yes
NELL1	chr11:20691116-21599651	5.24105	0.218358	-24.0021	0.00849486	yes
CACNG8	chr19:54462413-54493664	11.7877	0.492685	-23.9254	1.71976e-06	yes
-	chr13:77460857-77465274	0.587475	0.0245836	-23.897	0.029533	yes
CAP2	chr6:17393735-17558023	42.6279	1.79278	-23.7775	6.01617e-08	yes
TMEM130	chr7:98444110-98467673	65.2058	2.7497	-23.7138	2.21989e-06	yes
OTOGL	chr12:80603232-80774631	1.28909	0.0546898	-23.5709	0.00902535	yes
ITPKA	chr15:41786055-41795757	29.6927	1.2624	-23.5208	7.16111e-05	yes
STEAP2	chr7:89840999-89866992	10.3205	0.43879	-23.5204	0.000234707	yes
-	chr2:226563508-226568502	0.740692	0.0315879	-23.4486	0.00807081	yes
SYNGR3	chr16:2039945-2044276	55.7265	2.38471	-23.3683	3.5407e-09	yes
SCN3B	chr11:123499894-123525315	21.5527	0.925111	-23.2974	0.00172018	yes
NEUROD1	chr2:182540673-182545392	1.68771	0.0727484	-23.1993	0.0119853	yes
GDA	chr9:74729510-74867140	19.3494	0.834439	-23.1885	4.45804e-05	yes
STXBP5L	chr3:120627049-121143973	4.8677	0.21135	-23.0315	0.0111088	yes
MAP3K9	chr14:71189243-71275897	4.62093	0.200804	-23.0121	8.468e-06	yes
WNT10B	chr12:49359121-49365641	9.75883	0.424399	-22.9945	2.18887e-05	yes
FLJ33534	chr2:11237999-11272302	1.85554	0.0807771	-22.9711	0.00567968	yes
CADPS2	chr7:121958477-122526827	14.1265	0.618112	-22.8543	2.37484e-05	yes
-	chr7:97541176-97542318	3.30603	0.146314	-22.5954	0.0131288	yes
FAM163B	chr9:136443536-136445368	22.0146	0.982689	-22.4024	1.00889e-06	yes
-	chr12:13692838-13706930	4.74186	0.212874	-22.2754	9.60181e-10	yes
DLX6-AS1	chr7:96584450-96643377	1.13928	0.0511843	-22.2584	3.17794e-06	yes
-	chr5:56909569-56913482	6.11157	0.274689	-22.2491	0.00701695	yes
CNTN6	chr3:1134628-1445278	1.15194	0.0518126	-22.2328	0.00149153	yes
ASB2	chr14:94400498-94443076	2.16306	0.0975957	-22.1635	0.0157896	yes
FADS6	chr17:72870891-72889765	2.34277	0.106002	-22.1012	0.0337069	yes
PART1	chr5:58264865-59843484	8.25662	0.373796	-22.0886	0.0326281	yes
-	chr10:10768016-10772070	0.888577	0.0405917	-21.8906	0.0195346	yes
STMN2	chr8:80523048-80578421	215.352	9.84789	-21.8678	9.58237e-07	yes
CELF3	chr1:151672533-151689290	13.2108	0.60784	-21.734	1.64836e-06	yes
ATP2B3	chrX:152801579-152848388	9.13538	0.421522	-21.6724	2.17874e-05	yes
ANKRD33B	chr5:10564434-10657947	2.6963	0.124478	-21.6609	0.00414125	yes
JPH3	chr16:87636498-87799728	38.4395	1.77755	-21.625	2.04502e-05	yes
VAV3	chr1:108113781-108507545	2.351	0.108863	-21.596	0.00386799	yes
GABRG3	chr15:27216428-27787112	0.955474	0.0444566	-21.4923	3.50219e-05	yes
CREG2	chr2:101961848-102003965	20.741	0.967697	-21.4334	2.81755e-08	yes
COL23A1	chr5:177664081-178017556	3.13127	0.146823	-21.3268	0.00468879	yes
C2orf55	chr2:99410306-99552684	13.7989	0.650215	-21.2221	1.34614e-07	yes
RFPL1-AS1	chr22:29832940-29874117	13.3677	0.630275	-21.2093	1.70489e-06	yes
ABCG4	chr11:119019749-119033374	4.93266	0.233193	-21.1527	8.50998e-06	yes
FAM123C	chr2:131513076-131525707	2.5576	0.121161	-21.1091	6.0237e-05	yes
KCNJ6	chr21:38989473-39290987	2.5193	0.119389	-21.1016	0.0020762	yes
NRG1	chr8:31497267-32628778	2.40942	0.114299	-21.08	0.0473629	yes
COL24A1	chr1:86194915-86622648	3.04404	0.144537	-21.0606	9.0516e-05	yes
NXPH2	chr2:139426726-139537811	1.84193	0.0875631	-21.0355	0.0006639	yes
SV2C	chr5:75379168-75629964	2.01492	0.0960284	-20.9825	0.00169948	yes
EGR4,FBXO41	chr2:73481028-73520829	34.0368	1.62479	-20.9484	4.12403e-05	yes
HPCA	chr1:33352097-33366953	60.2286	2.8763	-20.9396	0.0133812	yes
C17orf102	chr17:32901141-32906388	0.618112	0.0296948	-20.8155	0.0208407	yes
TNNT1	chr19:55644160-55660606	11.157	0.538346	-20.7246	0.000460586	yes
FAM153A	chr5:177138057-177207505	7.59042	0.367696	-20.6432	0.0228152	yes
EPHB6	chr7:142552791-142568847	40.0509	1.9419	-20.6246	3.49388e-08	yes
NCEH1	chr3:172348231-172429008	11.6653	0.566774	-20.5819	8.0835e-06	yes
TNNT2	chr1:201328140-201346852	14.6206	0.710887	-20.5667	2.07164e-05	yes
CPNE4	chr3:131252413-131756612	12.8723	0.627009	-20.5297	3.01708e-05	yes
CTXN2	chr15:48483866-48495951	1.95954	0.0956717	-20.4819	0.000188332	yes
EPHA7	chr6:93949739-94129300	2.25567	0.111006	-20.3203	0.0024152	yes
SCN4B	chr11:118004091-118023630	19.392	0.96093	-20.1805	1.70926e-05	yes
MEF2C	chr5:88014057-88464429	34.9431	1.73236	-20.1708	6.64796e-05	yes
HRH3	chr20:60790016-60795323	9.22651	0.45778	-20.1549	0.00595964	yes
HS6ST3	chr13:96743092-97491816	6.27462	0.312454	-20.0817	1.96241e-09	yes
CDH9	chr5:26880708-27038992	2.57264	0.128402	-20.0358	0.0031685	yes
SCN1A	chr2:166845669-167005642	10.1778	0.508253	-20.0251	2.20054e-08	yes
EPHA4	chr2:222282712-222437010	9.73336	0.487097	-19.9824	2.05377e-07	yes
LOC157627,MIR124-1	chr8:9757331-9763482	28.9605	1.46538	-19.7631	1.51109e-07	yes
STX1A	chr7:73113532-73134023	66.4798	3.37186	-19.7161	0.00255352	yes
NRXN1	chr2:50145642-51259674	32.7985	1.66454	-19.7042	1.63127e-07	yes
CACNA1B	chr9:140772240-141019076	4.07599	0.207198	-19.672	4.10022e-05	yes
CHGB	chr20:5891973-5906005	31.0453	1.57973	-19.6523	1.17156e-08	yes
SVOP	chr12:109304251-109458845	16.5437	0.843257	-19.6188	1.06671e-05	yes
KIAA1045	chr9:34957535-34982542	19.0393	0.972041	-19.5869	2.23025e-08	yes
GLRB	chr4:157997276-158093242	23.2304	1.1907	-19.5099	1.03945e-07	yes
-	chr14:42052640-42075171	0.660471	0.0338869	-19.4905	0.00645972	yes
SPHKAP	chr2:228844669-229046361	5.73357	0.294186	-19.4896	9.30043e-05	yes
UNC5A	chr5:176237559-176326333	17.444	0.895363	-19.4826	9.05555e-06	yes
-	chr11:115035299-115040943	1.04438	0.0539653	-19.3528	0.00140013	yes
PAK3	chrX:110187512-110470588	6.31999	0.329407	-19.186	1.8816e-08	yes
FBXL16	chr16:742498-755837	202.249	10.5684	-19.1371	0.000459033	yes
NIPAL2	chr8:99201876-99307211	8.41204	0.440144	-19.112	0.00198608	yes
FRMPD4	chrX:12156584-12742935	2.88411	0.151393	-19.0505	2.56451e-06	yes
CADPS	chr3:62384019-62861064	48.752	2.56099	-19.0364	1.48686e-05	yes
HTR1A	chr5:63253567-63258257	1.73653	0.0912392	-19.0327	0.00112942	yes
DLGAP2	chr8:1449406-1656642	4.04278	0.21268	-19.0087	0.000697874	yes
PTPRR	chr12:71031812-71314584	4.40865	0.232041	-18.9994	0.00072066	yes
LOC644242	chr1:120102426-120145746	2.77583	0.146191	-18.9877	0.0160023	yes
NPM2	chr8:21881352-21894683	27.751	1.46339	-18.9635	0.00016957	yes
DACH2	chrX:85403454-86087605	3.26894	0.172392	-18.9622	0.00468879	yes
FREM3	chr4:144493209-144621828	0.678833	0.035803	-18.9602	0.0301084	yes
SNAP91	chr6:84262499-84419127	93.99	4.98092	-18.87	0.000138301	yes
-	chr2:223178696-223183765	1.54273	0.0819067	-18.8352	0.000170288	yes
MATK	chr19:3777966-3801810	36.1024	1.92503	-18.7542	1.30524e-05	yes
HMP19	chr5:173472721-173536276	59.2313	3.17552	-18.6525	0.0154025	yes
KCNK9	chr8:140613086-140715299	2.73214	0.146505	-18.6488	0.0166841	yes
KALRN	chr3:123813557-124446325	35.3218	1.8945	-18.6444	3.25328e-05	yes
HSD3BP4	chr1:120102426-120145746	0.762072	0.0410695	-18.5557	0.00630618	yes
CNR1	chr6:88849584-88875767	6.31144	0.340728	-18.5234	1.26649e-05	yes
TSPAN13	chr7:16793350-16824283	51.438	2.78992	-18.4371	8.98846e-07	yes
GRM5	chr11:88235863-88796816	6.52988	0.35496	-18.3961	1.26322e-06	yes
CACNB4	chr2:152689280-152955593	8.85846	0.481644	-18.3921	1.65406e-06	yes
MRAP2	chr6:84743419-84800605	6.99967	0.380636	-18.3894	4.39249e-06	yes
CACNA1E	chr1:181452685-181775921	3.38279	0.183977	-18.387	5.77252e-08	yes
GAD2	chr10:26505235-26593491	6.22242	0.339133	-18.348	1.27131e-05	yes
UNC13C	chr15:54270441-54920999	8.7164	0.475067	-18.3477	3.87677e-07	yes
SRRM3	chr7:75831215-75916890	15.1181	0.826021	-18.3023	9.82741e-05	yes
C1orf173	chr1:75033794-75139422	5.26974	0.292848	-17.9948	4.52442e-08	yes
DOK6	chr18:67068283-67517585	4.17091	0.232986	-17.902	6.01617e-08	yes
KCNH3	chr12:49932939-49961911	23.5677	1.3243	-17.7963	0.00458749	yes
GABRB3	chr15:26788693-27018935	14.4227	0.812204	-17.7575	2.89647e-07	yes
CXCL14	chr5:134906370-134914969	35.9434	2.02946	-17.7108	6.44046e-08	yes
SNX10	chr7:26331514-26413949	38.0144	2.14947	-17.6855	1.03945e-07	yes
CNKSR2	chrX:21392535-21673534	17.6331	1.00214	-17.5954	3.8526e-05	yes
LNX1	chr4:54243768-54457724	13.8455	0.788688	-17.5551	0.0166841	yes
PTPN3	chr9:112137973-112260593	1.86752	0.106517	-17.5326	0.0331161	yes
KCNIP4	chr4:20702035-21950374	21.5571	1.23027	-17.5223	0.0234449	yes
CELF5	chr19:3224700-3297073	21.4922	1.22671	-17.5202	4.49404e-05	yes
NMNAT2	chr1:183217073-183387634	18.9076	1.08049	-17.4991	2.55056e-07	yes
HAR1A	chr20:61726844-61735737	4.62267	0.264591	-17.471	0.000205716	yes
LOC100507351	chr17:75543022-75564897	0.706338	0.0406597	-17.3719	0.0132244	yes
SLC32A1	chr20:37353104-37358015	4.64634	0.268036	-17.3348	0.000227694	yes
ADAM23	chr2:207308283-207486039	25.072	1.44696	-17.3274	8.07953e-06	yes
RIMS4	chr20:43374487-43438979	13.9745	0.80909	-17.2719	7.96568e-09	yes
EPHA5	chr4:66184776-66559104	1.3903	0.0805104	-17.2686	0.00144129	yes
AGAP2	chr12:58117055-58135944	44.0206	2.55138	-17.2536	0.000225367	yes
NETO1	chr18:70409548-70534810	8.80704	0.511232	-17.2271	0.00165062	yes
KSR2	chr12:117890816-118406028	1.80096	0.105031	-17.1469	1.73257e-07	yes
NAP1L2	chrX:72432136-72434710	45.1298	2.63463	-17.1295	2.47639e-09	yes
SYT5	chr19:55682563-55691720	47.36	2.76747	-17.1131	7.14402e-06	yes
KCNQ3	chr8:133133104-133493004	6.73236	0.399373	-16.8573	9.60181e-10	yes
DLX1	chr2:172949096-172954401	4.03052	0.239123	-16.8554	0.034778	yes
AMPH	chr7:38423296-38671167	26.2194	1.56163	-16.7898	0.000812086	yes
CACNB3	chr12:49208214-49222726	21.8562	1.30505	-16.7474	0.000105761	yes
SCN8A	chr12:51985019-52206649	11.0141	0.662056	-16.6362	5.65408e-08	yes
CDH22	chr20:44802375-44936961	9.3888	0.564398	-16.6351	4.92071e-06	yes
LPPR4	chr1:99729847-99775138	9.41049	0.569346	-16.5286	0.00245049	yes
PRRG3	chrX:150863729-150874694	8.99329	0.544182	-16.5263	0.00171015	yes
NUDT11	chrX:51138930-51381216	10.1946	0.619651	-16.4522	1.04357e-06	yes
-	chr13:108521030-108525773	0.553683	0.0336991	-16.4302	0.038073	yes
PNMA3	chrX:152224765-152228827	27.9653	1.71076	-16.3467	2.76049e-05	yes
CRABP1	chr15:78632665-78640572	14.1446	0.867033	-16.3138	0.000509216	yes
STAC2	chr17:37366788-37382119	19.7681	1.2158	-16.2593	0.00168465	yes
KRT222	chr17:38810644-38821428	9.55692	0.587969	-16.2541	6.21767e-05	yes
-	chr12:131109950-131112168	1.04718	0.0644352	-16.2517	0.0411564	yes
CACNA2D3	chr3:54156692-55108584	9.59645	0.593083	-16.1806	3.92413e-08	yes
DIRAS2	chr9:93372113-93405133	33.5492	2.08618	-16.0816	1.48913e-07	yes
DGKB	chr7:14184673-15014689	4.91925	0.306981	-16.0246	1.40642e-06	yes
NELL2	chr12:44902057-45307711	40.9439	2.55721	-16.0112	6.88433e-06	yes
NRIP3	chr11:9002122-9025596	11.4097	0.712692	-16.0093	2.92899e-06	yes
WBSCR17	chr7:70597788-71178590	37.4296	2.34949	-15.9309	4.92453e-05	yes
-	chr12:11651195-11657710	0.899339	0.0566014	-15.889	0.00873811	yes
RIMS1	chr6:72596507-73112899	16.5492	1.04182	-15.8849	6.86529e-06	yes
GFRA2	chr8:21549521-21646356	10.5367	0.665594	-15.8305	0.000761801	yes
-	chr14:86098831-86106317	0.891651	0.0566995	-15.7259	0.00070686	yes
PITPNM3	chr17:6354582-6459877	9.18186	0.585978	-15.6693	3.48131e-06	yes
KCNT2	chr1:196194911-196577499	1.46383	0.0934706	-15.6609	0.000186742	yes
EPB49	chr8:21911080-21940036	111.321	7.11075	-15.6553	0.000404205	yes
RPS6KA6	chrX:83313054-83442943	1.36415	0.0873108	-15.6241	0.00217112	yes
BMPER	chr7:33944522-34195484	2.36214	0.151416	-15.6003	0.000747981	yes
EIF4E1B	chr5:176057672-176073978	1.79236	0.114922	-15.5963	0.0217668	yes
RTN4RL2	chr11:57228239-57245005	14.1096	0.904869	-15.593	0.00109939	yes
SHANK2	chr11:70313913-70935808	6.65267	0.427351	-15.5672	4.54133e-06	yes
NPAS1	chr19:47524142-47549017	3.178	0.204971	-15.5046	0.00411936	yes
-	chr10:134896474-134901299	1.34138	0.0865753	-15.4938	0.0238096	yes
PCLO	chr7:82383320-82792197	4.36736	0.282999	-15.4324	2.347e-05	yes
MYADML2	chr17:79897520-79909056	1.79203	0.116808	-15.3417	0.0190144	yes
KCTD16	chr5:143550436-143865714	2.86688	0.187591	-15.2826	4.92093e-06	yes
COL5A2	chr2:189896640-190044605	5.8148	0.380713	-15.2734	7.1621e-08	yes
LRRTM4	chr2:76973982-77749502	4.54023	0.298154	-15.2278	0.000514887	yes
NOL4	chr18:31431063-31803515	5.07435	0.334817	-15.1556	0.0119021	yes
ACTL6B	chr7:100240725-100254084	20.7371	1.3752	-15.0793	0.000871449	yes
ADD2	chr2:70880703-70995375	8.36683	0.555943	-15.0498	0.000747777	yes
CDK14	chr7:90338711-90839906	19.5232	1.302	-14.9948	1.27027e-06	yes
GRHL1	chr2:10091791-10142452	1.13943	0.0760021	-14.9921	0.0375449	yes
C1orf115	chr1:220863627-220872499	30.3541	2.03382	-14.9247	7.33948e-09	yes
CNNM1	chr10:101088855-101154137	8.25453	0.555401	-14.8623	1.68787e-05	yes
-	chrX:111011174-111015454	1.2659	0.0854224	-14.8193	0.00410531	yes
IPCEF1	chr6:154331630-154677900	8.30173	0.562369	-14.7621	2.72366e-07	yes
PCP4L1	chr1:161228516-161255240	12.6534	0.861849	-14.6817	6.71279e-06	yes
-	chr3:142682528-142685331	1.55928	0.106374	-14.6585	0.0264289	yes
RIMBP2	chr12:130880598-131002410	13.0433	0.893627	-14.5959	0.000156311	yes
SLC8A2	chr19:47931272-47975307	24.1041	1.66018	-14.519	0.0016822	yes
CACNG2	chr22:36956915-37098690	6.0762	0.419823	-14.4732	0.000112195	yes
RAB3A	chr19:18304039-18314874	163.449	11.2986	-14.4663	0.000227694	yes
PRKAR1B	chr7:588833-826116	146.683	10.1841	-14.4031	0.0473629	yes
CCNO	chr5:54525158-54529586	2.99349	0.208018	-14.3905	0.0362959	yes
RGS7	chr1:240938813-241520633	31.1107	2.16494	-14.3702	0.00123398	yes
THRB	chr3:24158571-24563863	9.23401	0.642797	-14.3654	9.28484e-08	yes
RELL2	chr5:141016516-141030986	15.9655	1.11318	-14.3422	0.0172545	yes
-	chr5:2096868-2120624	1.26556	0.0882666	-14.3379	0.023502	yes
GRM2	chr3:51741080-51752625	7.63624	0.53336	-14.3172	0.00212675	yes
NAPB	chr20:23355155-23402156	106.797	7.49174	-14.2553	0.00339021	yes
CAMSAP3	chr19:7660787-7683196	5.71093	0.401733	-14.2157	9.58173e-06	yes
INPP5J	chr22:31518918-31530683	5.37804	0.378335	-14.215	0.0132883	yes
CCK	chr3:42299317-42307662	207.927	14.6562	-14.187	4.90616e-05	yes
CLSTN3	chr12:7282966-7311536	52.8579	3.72881	-14.1755	0.000266739	yes
ZNF385D	chr3:21457820-21902428	2.3179	0.163801	-14.1507	0.044007	yes
-	chr4:190154606-190156620	1.19135	0.0849471	-14.0246	0.0427253	yes
ADRA1B	chr5:159343630-159400017	3.28117	0.234186	-14.011	0.0256477	yes
KCNB1	chr20:47979625-48099181	7.04871	0.503948	-13.987	3.12755e-08	yes
EFNA5	chr5:106712480-107006665	3.63881	0.261191	-13.9316	0.00134089	yes
TUBA4A	chr2:220110191-220136910	126.222	9.07049	-13.9157	0.00064168	yes
PAK7	chr20:9518016-9819687	3.81693	0.274346	-13.9128	3.15758e-05	yes
SNTG1	chr8:50822434-51710047	3.70427	0.266612	-13.8939	6.31138e-05	yes
MAST1	chr19:12936294-12985774	17.7976	1.2811	-13.8924	9.94634e-05	yes
CDS1	chr4:85504056-85572493	7.85417	0.566363	-13.8677	1.3111e-05	yes
PDP1	chr8:94929082-94938311	22.7474	1.6437	-13.8391	1.05139e-05	yes
SYBU	chr8:110586404-110704020	33.1888	2.413	-13.7542	0.00200509	yes
HS3ST2	chr16:22825859-22927659	12.991	0.94463	-13.7525	0.00473483	yes
KCNAB2	chr1:5922869-6161253	77.946	5.684	-13.7132	0.000896328	yes
-	chr7:13143221-13145094	2.19527	0.160293	-13.6954	0.0221978	yes
SLC1A2	chr11:35272751-35441610	105.322	7.73445	-13.6173	0.00857864	yes
ISLR2	chr15:74421714-74429143	3.29173	0.242193	-13.5914	0.000474229	yes
GP1BB,SEPT5	chr22:19701471-19712297	192.605	14.1736	-13.589	0.00453082	yes
MCTP1	chr5:94034691-94620279	2.70742	0.199401	-13.5778	0.00423685	yes
CACNA1G	chr17:48633567-48704832	4.73062	0.350499	-13.4968	0.0152786	yes
KCNH4	chr17:40308752-40333296	1.00735	0.0748254	-13.4627	0.0473919	yes
BASP1	chr5:17217749-17276943	183.67	13.6951	-13.4114	4.58036e-06	yes
ATP2B1	chr12:89954634-90105729	40.8051	3.05118	-13.3735	8.02297e-05	yes
BUB1B,PAK6	chr15:40453209-40569688	7.88687	0.590624	-13.3535	0.00155686	yes
SLC45A4	chr8:142217271-142317319	5.35226	0.402583	-13.2948	0.00069487	yes
ZNF204P	chr6:27325599-27343153	13.0806	0.987019	-13.2526	1.7798e-05	yes
RASL11B	chr4:53728494-53733002	6.04151	0.457149	-13.2156	0.000667091	yes
KIAA1804	chr1:233463513-233520894	0.785658	0.0595807	-13.1865	0.00235914	yes
RIMS2	chr8:104493153-105266920	18.269	1.38897	-13.1529	5.06373e-06	yes
HS6ST2	chrX:131760037-132095423	2.54824	0.193778	-13.1503	0.00882471	yes
-	chr22:32897360-32898932	2.96876	0.226053	-13.133	0.0088751	yes
ABCC12	chr16:48114821-48180681	1.13908	0.0869977	-13.0932	0.0296682	yes
VGF	chr7:100805789-100810462	31.9924	2.44972	-13.0596	0.0038228	yes
TMEM151B	chr6:44238479-44247472	25.9912	1.99064	-13.0567	2.60657e-06	yes
ANK1	chr8:41510742-41754280	4.85314	0.371936	-13.0483	0.0070477	yes
SPTBN2	chr11:66452690-66488870	51.8164	3.99843	-12.9592	0.000588143	yes
GLT1D1	chr12:129338080-129469745	7.13533	0.552526	-12.914	0.0261883	yes
FBLL1	chr5:167956581-167957639	33.5329	2.60112	-12.8917	1.99367e-06	yes
ICA1	chr7:8152814-8302434	13.3055	1.0351	-12.8543	0.00374388	yes
RNF175	chr4:154630284-154681387	12.9352	1.00755	-12.8383	0.00131264	yes
ABCD2	chr12:39939833-40013843	1.67691	0.13062	-12.8381	0.00464636	yes
HPRT1	chrX:133594174-133634704	61.4292	4.82288	-12.737	3.30331e-06	yes
GRIA1	chr5:152870083-153193429	19.0429	1.49624	-12.7272	7.41137e-06	yes
BCL11A	chr2:60678301-60781074	9.87269	0.776769	-12.7099	0.00111805	yes
WIPF3	chr7:29846169-29956682	11.2611	0.886227	-12.7068	4.36529e-05	yes
LPHN2	chr1:82266081-82459612	7.76102	0.611891	-12.6837	8.14026e-05	yes
SYT12	chr11:66790189-66818551	10.546	0.833368	-12.6547	0.00108651	yes
HES5	chr1:2460183-2461684	3.02228	0.239126	-12.6389	0.0201819	yes
RNF165	chr18:43914186-44043097	4.54327	0.361107	-12.5815	0.0020172	yes
SNPH	chr20:1246959-1289971	31.1026	2.47955	-12.5436	1.33933e-07	yes
GULP1	chr2:189156395-189460657	2.3377	0.187068	-12.4965	0.00927647	yes
CAMKK1	chr17:3763616-3796337	35.7923	2.86724	-12.4832	0.000287499	yes
ARPP21	chr3:35680973-35835988	22.7182	1.82149	-12.4723	0.000104394	yes
PANX2	chr22:50609159-50618724	18.7591	1.50484	-12.4658	5.78872e-06	yes
EEF1A2	chr20:62119227-62130505	298.005	24.006	-12.4138	0.0248543	yes
B7H6	chr11:17373308-17404016	1.99754	0.161187	-12.3927	8.6904e-07	yes
CALY	chr10:135138927-135150475	89.6536	7.24215	-12.3794	6.01454e-07	yes
-	chr4:24175751-24178640	1.55607	0.125798	-12.3696	0.0117952	yes
CAMK1D	chr10:12391540-12877545	47.7341	3.86611	-12.3468	1.36617e-05	yes
TMEM196	chr7:19758937-19813263	1.87529	0.152621	-12.2872	0.00154146	yes
-	chr2:155544808-155553375	0.630667	0.0513381	-12.2846	0.0412036	yes
CRH	chr8:67088611-67090846	2.64635	0.215509	-12.2795	0.0243967	yes
SORBS2	chr4:186506597-186877870	14.5709	1.18996	-12.2449	0.00041979	yes
-	chr5:106698858-106702426	1.13212	0.0925413	-12.2337	0.00758639	yes
HLF	chr17:53342320-53402516	19.3563	1.58687	-12.1978	1.91932e-06	yes
GLB1L3	chr11:134146274-134189458	1.39795	0.114791	-12.1782	0.0069897	yes
MTUS2	chr13:29598484-30080084	2.85847	0.234747	-12.1768	0.00977271	yes
SYNPO	chr5:149980641-150038792	52.251	4.31371	-12.1128	5.32326e-06	yes
RNF128	chrX:105937067-106040246	2.14625	0.177453	-12.0948	0.00623363	yes
NUDT10	chrX:51075082-51080377	6.60629	0.550189	-12.0073	0.00018191	yes
-	chr2:166842394-166843074	8.57218	0.714682	-11.9944	0.00884578	yes
KLHL29	chr2:23608297-23931483	3.14839	0.262673	-11.986	0.000322855	yes
GJD2	chr15:35043091-35047030	1.08629	0.0906415	-11.9845	0.0176085	yes
-	chr4:564537-568997	4.3855	0.36632	-11.9718	4.74706e-06	yes
-	chr8:1982649-1990114	0.7447	0.0622565	-11.9618	0.0218345	yes
RERG	chr12:15260715-15374411	5.15964	0.431598	-11.9547	4.91142e-05	yes
KCNH1	chr1:210851357-211307457	5.23785	0.439596	-11.9151	0.0265251	yes
RORB	chr9:77109887-77308092	4.80137	0.403241	-11.9069	9.77215e-09	yes
KIAA0319	chr6:24544331-24646383	4.94607	0.415518	-11.9034	0.000127031	yes
SOX5	chr12:23679935-24715380	1.09239	0.0918031	-11.8993	0.0362959	yes
GNG2	chr14:52294467-52436518	22.661	1.90984	-11.8654	1.82772e-06	yes
SLC1A6	chr19:15060842-15090364	7.43895	0.62996	-11.8086	0.0337069	yes
RAP1GAP2	chr17:2680185-2941062	8.86012	0.750815	-11.8007	0.000322855	yes
NPY1R	chr4:164245116-164253947	3.90535	0.331319	-11.7873	0.000175941	yes
HUNK	chr21:33245627-33376543	1.00099	0.0850008	-11.7762	0.00171386	yes
-	chr16:29132566-29143494	0.745415	0.0634455	-11.7489	0.00094435	yes
TMEM35	chrX:100333835-100351355	18.9753	1.61791	-11.7283	1.63711e-06	yes
MPPED1	chr22:43807554-43903780	27.4721	2.34755	-11.7025	6.09975e-05	yes
MLLT11	chr1:151032150-151040973	76.4972	6.55101	-11.6772	4.67811e-07	yes
DIO2	chr14:80663867-80921810	7.35639	0.632523	-11.6302	5.12151e-08	yes
KCNJ3	chr2:155553632-155717969	6.44954	0.55508	-11.6191	0.00169694	yes
PSD	chr10:104162372-104182896	182.891	15.8296	-11.5537	0.00712954	yes
PRSS3	chr9:33750463-33799229	20.0979	1.74228	-11.5354	0.00857664	yes
KCNN1	chr19:18062110-18110865	26.1436	2.26804	-11.527	7.9648e-05	yes
-	chr11:30001492-30003952	1.42435	0.124011	-11.4857	0.0184724	yes
PCDH7	chr4:30721645-31148491	5.98788	0.521977	-11.4715	8.20857e-07	yes
SV2B	chr15:91643181-91845235	16.0663	1.40407	-11.4427	0.000361367	yes
PPP3R1	chr2:68405988-68479651	110.979	9.79737	-11.3274	0.000172976	yes
-	chr2:162283796-162287910	1.06211	0.0940215	-11.2965	0.0114181	yes
C12orf68	chr12:48577365-48579709	16.3343	1.44624	-11.2943	7.63159e-06	yes
NSF	chr17:44450178-44834828	91.8552	8.148	-11.2733	0.00774053	yes
FAXC	chr6:99720275-99797531	3.04121	0.271339	-11.2082	2.64355e-05	yes
KIAA2022	chrX:73952690-74145287	0.89305	0.0796801	-11.2079	7.48052e-05	yes
CDH10	chr5:24487208-24645085	7.1573	0.638734	-11.2054	1.82772e-06	yes
-	chr3:44115640-44119056	0.999278	0.0893129	-11.1885	0.0241567	yes
FLRT3	chr20:13976145-16033841	3.28411	0.296021	-11.0942	0.0343362	yes
FBLN7	chr2:112895961-112946088	3.90107	0.352216	-11.0758	0.0193315	yes
TRNP1	chr1:27320169-27328115	16.5993	1.49893	-11.0741	6.17219e-06	yes
PLK2	chr5:57749805-57755966	21.1811	1.91433	-11.0645	4.39249e-06	yes
SSX2IP	chr1:85109389-85156240	11.9764	1.08753	-11.0125	1.05849e-05	yes
FLJ22184	chr19:7933604-7939326	15.1361	1.3759	-11.0009	0.000266739	yes
ELOVL4	chr6:80624528-80657315	9.37522	0.853546	-10.9838	9.77664e-07	yes
FAM57B	chr16:30034654-30046697	22.4331	2.04568	-10.9661	0.000207245	yes
LRRN3	chr7:110303105-111202573	6.88081	0.628355	-10.9505	0.000981517	yes
GUCY1A2	chr11:106544737-106889171	2.58379	0.236044	-10.9462	9.04102e-08	yes
PRKAR2B	chr7:106685177-106802314	20.5542	1.88128	-10.9256	6.22019e-08	yes
-	chr14:105550189-105553670	1.19545	0.109446	-10.9227	0.0146727	yes
GRB14	chr2:165349274-165478360	3.12302	0.28602	-10.9189	0.00226148	yes
C2orf80	chr2:209029976-209054799	17.2278	1.57889	-10.9113	0.00884578	yes
TPBG	chr6:83072922-83077133	6.51595	0.597569	-10.9041	6.61564e-05	yes
-	chr7:49957576-49961808	0.91757	0.0843821	-10.874	0.0132883	yes
DIRAS1	chr19:2714564-2723740	39.4517	3.63315	-10.8588	3.82843e-06	yes
EXTL1	chr1:26348270-26362954	15.9506	1.47035	-10.8482	0.00633417	yes
LOC147670	chr19:57154526-57168635	3.55754	0.330389	-10.7677	0.0031445	yes
LMO3	chr12:16701080-16762921	53.1184	4.97826	-10.6701	0.00129255	yes
BSN	chr3:49591921-49708982	7.53372	0.7061	-10.6695	1.32808e-06	yes
GABRA3	chrX:151334697-151619929	6.31912	0.59305	-10.6553	0.00177353	yes
ACCN1	chr17:31340105-32483825	6.3551	0.597324	-10.6393	0.00278838	yes
ADAM11	chr17:42836518-42859216	17.043	1.60947	-10.5892	8.80943e-05	yes
B4GALNT1	chr12:58013692-58027470	13.7081	1.29599	-10.5773	0.0150038	yes
SYT16	chr14:62279455-62579269	4.98651	0.471829	-10.5685	0.00205436	yes
RIMKLA	chr1:42846467-42891654	4.03814	0.38217	-10.5663	9.58173e-06	yes
CAMK2B	chr7:44256736-44365926	79.5382	7.52943	-10.5636	0.00756048	yes
UNC80	chr2:210636716-210864024	5.94361	0.563102	-10.5551	3.70261e-06	yes
DRP2	chrX:100474732-100519624	5.21134	0.494612	-10.5362	5.06758e-05	yes
LPPR3	chr19:812517-821952	3.87119	0.369572	-10.4748	0.0124357	yes
-	chr17:51183487-51183852	30.3045	2.89335	-10.4738	0.00659289	yes
ERC2	chr3:55542335-56502391	3.44538	0.330994	-10.4092	1.13698e-05	yes
FAM189A1	chr15:29412453-29862927	5.15033	0.49491	-10.4066	0.0167862	yes
-	chr1:241594814-241597030	1.28499	0.123506	-10.4043	0.0248543	yes
RAB26	chr16:2198650-2204141	22.3614	2.15201	-10.3909	1.65406e-06	yes
GPR158	chr10:25447000-25891164	8.53969	0.823038	-10.3758	1.29651e-05	yes
MEIS3	chr19:47906375-47922785	41.5722	4.00672	-10.3756	0.00487478	yes
CHRNA7	chr15:32322685-32462384	1.8483	0.179349	-10.3056	0.0367016	yes
PRKCE	chr2:45879042-46415129	13.9023	1.35352	-10.2712	3.4569e-06	yes
CARTPT	chr5:71014989-71016875	18.0317	1.75867	-10.253	0.000161727	yes
HOPX	chr4:57514153-57547872	131.715	12.8547	-10.2464	1.01629e-05	yes
-	chr3:116824744-116827411	2.13067	0.208059	-10.2407	0.00633417	yes
KCNC4	chr1:110753335-110776674	8.5813	0.838104	-10.2389	1.47315e-05	yes
CNIH3	chr1:224804178-224928257	8.05595	0.787824	-10.2256	0.000925751	yes
LDB2	chr4:16503158-16900424	35.3427	3.47278	-10.1771	0.000149292	yes
ZDHHC23	chr3:113666747-113682202	3.46927	0.341972	-10.1449	0.00462743	yes
NHS	chrX:17393542-17754113	1.16642	0.115355	-10.1116	0.0200226	yes
FMN1	chr15:33057746-33360085	1.33094	0.131674	-10.1078	2.17412e-05	yes
ARNTL2	chr12:27485786-27578746	1.264	0.125628	-10.0615	0.000996353	yes
C19orf81	chr19:51152701-51228981	23.4903	2.33546	-10.0581	0.00374875	yes
NAP1L5	chr4:89513646-89630933	58.5383	5.86079	-9.98812	0.000144402	yes
-	chr10:84760738-84762905	1.11648	0.112443	-9.9293	0.0398675	yes
RPH3A	chr12:113229548-113336684	41.1598	4.1561	-9.90347	0.000149847	yes
ASAH2B	chr10:52499694-52519016	1.62449	0.164673	-9.86494	0.00116993	yes
RASL10A	chr22:29708921-29711748	18.3284	1.85911	-9.8587	0.00392197	yes
FAM84A	chr2:14772791-14790932	10.8732	1.1082	-9.81159	0.000760518	yes
RTN4R	chr22:20228937-20255816	21.4155	2.18745	-9.79017	9.51575e-06	yes
FLRT2	chr14:85996487-86094270	6.24163	0.639518	-9.7599	2.05377e-07	yes
CSMD3	chr8:113235118-114449244	3.4786	0.357018	-9.74349	0.016743	yes
C12orf53	chr12:6802950-6810009	45.833	4.73561	-9.67837	0.000190721	yes
RIT2	chr18:40323191-40695657	14.3181	1.48417	-9.64721	0.00784324	yes
CPNE5	chr6:36708548-36807612	14.8964	1.54654	-9.63208	0.000791058	yes
STS	chrX:6966960-7272684	4.24344	0.441725	-9.60652	0.0012894	yes
GRAMD1B	chr11:123396370-123498698	12.6583	1.31861	-9.59973	4.72528e-06	yes
DPY19L2P4	chr7:89748713-89754914	2.17537	0.227254	-9.57242	0.00362304	yes
NOV	chr8:120428493-120436678	6.77273	0.707729	-9.56967	0.00171015	yes
L1CAM	chrX:153126968-153141458	19.617	2.05402	-9.55054	8.36663e-05	yes
RET	chr10:43572516-43625797	1.67789	0.176118	-9.52708	0.0115152	yes
KCNIP2	chr10:103578824-103603677	35.548	3.73717	-9.51201	1.42725e-05	yes
NCS1	chr9:132934856-132999583	122.213	12.8521	-9.50919	0.00979313	yes
KCND2	chr7:119913721-120390387	3.20232	0.338405	-9.46298	1.59918e-05	yes
DRD1	chr5:174866530-174871163	1.85454	0.196513	-9.43724	0.0006349	yes
CASKIN1	chr16:2205798-2246471	16.5667	1.75612	-9.43369	0.00849956	yes
PRKCB	chr16:23847299-24231932	46.1102	4.88793	-9.43348	0.00398899	yes
BCL11B	chr14:99635624-99737829	1.31068	0.139804	-9.37513	0.0281144	yes
-	chr3:88045358-88049212	0.741601	0.0791365	-9.37116	0.0476898	yes
PRICKLE1	chr12:42850509-42983572	4.76081	0.509508	-9.34394	0.000713433	yes
KCNK3	chr2:26915580-26954066	2.7401	0.293251	-9.34387	0.000474229	yes
TTC9	chr14:71108503-71142077	5.68011	0.609191	-9.32402	5.66641e-06	yes
LYSMD2	chr15:52015260-52043650	30.67	3.29247	-9.31519	0.0002154	yes
MICAL2	chr11:12132137-12285332	60.3848	6.48342	-9.31373	0.0108982	yes
ACSL6	chr5:131285666-131347761	15.2385	1.63837	-9.30101	8.88646e-05	yes
SERTM1	chr13:37248048-37272528	2.26303	0.243593	-9.29021	0.00451823	yes
GPR176	chr15:40091069-40213131	6.66718	0.72183	-9.2365	0.000764641	yes
POU3F1	chr1:38496876-38572074	3.70151	0.401386	-9.22182	0.00144876	yes
LUZP1	chr1:23345940-23495351	7.39425	0.802203	-9.21743	0.000415743	yes
-	chr1:230450089-230451873	6.40178	0.695016	-9.21098	0.000465571	yes
TAGLN3	chr3:111717585-111732735	351.404	38.2076	-9.19723	0.00568124	yes
FAM81A	chr15:59694310-59815839	13.0668	1.42261	-9.18509	0.000109944	yes
MYO15A	chr17:18012019-18083116	0.601027	0.0655339	-9.17124	0.00591688	yes
OPCML	chr11:132284874-133402403	12.8912	1.40567	-9.17086	5.24974e-05	yes
GABRA2	chr4:46244645-46392085	7.08097	0.775643	-9.12916	0.0233715	yes
RHEBL1	chr12:49458467-49463775	3.19982	0.351745	-9.09699	0.0243439	yes
MCF2	chrX:138663923-138790381	3.36072	0.370093	-9.08074	0.0190819	yes
FHL2	chr2:105977282-106055230	12.9243	1.42353	-9.07905	0.0164852	yes
TRANK1	chr3:36860597-36986548	3.93288	0.44237	-8.89048	4.85962e-05	yes
VIPR1	chr3:42530790-42579065	11.1372	1.25294	-8.88885	0.00134089	yes
EPB41L4B	chr9:111933239-112083021	6.90714	0.777939	-8.87877	0.000569386	yes
SAMD5	chr6:147829810-147891334	0.620145	0.0698671	-8.87607	0.020918	yes
KCNF1	chr2:11051971-11054352	23.1588	2.61066	-8.87086	0.000431897	yes
N4BP3	chr5:177540555-177554094	2.1837	0.246866	-8.84569	0.0216266	yes
CDK5R1	chr17:30814104-30818324	43.7453	4.95545	-8.82771	6.71941e-05	yes
MKL2	chr16:14165195-14360630	11.1317	1.26538	-8.79712	1.25866e-05	yes
CPNE7	chr16:89642175-89663654	11.5571	1.31736	-8.77292	0.019436	yes
LPPR5	chr1:99355800-99614408	3.33864	0.380952	-8.76394	0.00449272	yes
EFHA2	chr8:16884746-16980791	14.693	1.67892	-8.75146	0.0003237	yes
FUT1	chr19:49251267-49258647	0.911958	0.104444	-8.73155	0.0189113	yes
-	chr3:76571610-76576047	1.26676	0.145129	-8.72851	0.00997881	yes
NPTN	chr15:73735498-73925753	114.38	13.113	-8.72264	0.000702806	yes
ABHD8	chr19:17402939-17417653	43.2171	4.96321	-8.70749	0.000697874	yes
WSCD2	chr12:108523510-108644313	3.87172	0.44481	-8.70421	0.00016957	yes
LAMP5	chr20:9494952-9511172	18.4919	2.12683	-8.69458	0.000322855	yes
LRRC73	chr6:43474706-43478424	4.54338	0.523739	-8.67489	0.00263566	yes
REEP1	chr2:86426555-86565206	13.7534	1.58591	-8.67224	0.0112529	yes
EFNB3	chr17:7608115-7614693	12.1171	1.39988	-8.65581	0.0129201	yes
LIN7A	chr12:81186298-81331891	3.48999	0.405001	-8.61724	0.00168908	yes
C17orf96	chr17:36827958-36831187	5.28692	0.613979	-8.61091	9.85353e-05	yes
THY1	chr11:119252487-119369944	248.049	28.876	-8.59014	0.0173496	yes
NRN1	chr6:5998051-6008047	81.882	9.59276	-8.53581	0.000663741	yes
CHML	chr1:241695433-241803701	2.72875	0.319848	-8.5314	0.00698623	yes
PPFIA4	chr1:203014505-203047864	16.2078	1.90342	-8.51509	3.63684e-05	yes
CLGN	chr4:141309606-141348815	1.05216	0.123973	-8.48701	0.0437108	yes
PTK2B	chr8:27168998-27316908	43.3238	5.10843	-8.48084	0.00070686	yes
ANO5	chr11:22214545-22304913	3.73107	0.442511	-8.43159	0.00023448	yes
PPP1R14C	chr6:150464187-150571528	6.81775	0.80942	-8.42301	0.000105682	yes
ARL4D	chr17:41476352-41478504	8.17785	0.973265	-8.40249	0.000542681	yes
-	chr15:88402981-88416696	3.35901	0.400399	-8.38916	0.000103517	yes
GUCY1B3	chr4:156680125-156728841	27.6861	3.30898	-8.36696	0.000454636	yes
CTXN1	chr19:7989345-8008708	116.574	13.9632	-8.34866	0.00284344	yes
CNIH2	chr11:66045695-66051683	65.7756	7.88019	-8.34696	0.000402686	yes
C1orf233	chr1:1533140-1538215	12.9244	1.55126	-8.33155	0.000760518	yes
-	chr13:88335741-88346582	3.71934	0.449991	-8.26537	0.00374388	yes
LZTS1	chr8:20103675-20161458	8.83805	1.07004	-8.25955	1.42725e-05	yes
PCDH19	chrX:99546641-99665271	1.48901	0.180314	-8.25787	0.000744208	yes
TFR2	chr7:100218038-100239173	2.90526	0.353683	-8.2143	0.00808649	yes
HPCAL4	chr1:40143759-40157302	27.3183	3.33783	-8.18445	3.6331e-05	yes
ADAM22	chr7:87563565-87832360	7.29089	0.892599	-8.16816	0.0240141	yes
MCHR1	chr22:41075160-41078818	3.23535	0.396112	-8.16777	0.00537606	yes
FAM49A	chr2:16730729-16847134	24.1279	2.95465	-8.16608	7.67313e-05	yes
PLCXD2	chr3:111393522-111695364	2.24851	0.276137	-8.14273	0.00860766	yes
BEGAIN	chr14:101003483-101053640	15.3927	1.89426	-8.12597	0.000101639	yes
SORCS1	chr10:108333420-108924466	3.06249	0.377603	-8.11034	0.00502456	yes
-	chr15:84906298-84951655	1.17645	0.145078	-8.10909	0.0228079	yes
FAM3C	chr7:120988904-121036422	32.5749	4.01713	-8.109	4.65179e-06	yes
-	chr1:2475652-2478896	1.03477	0.128225	-8.06996	0.0291938	yes
SYT15	chr10:46951526-46972893	8.13528	1.00851	-8.06663	5.34979e-05	yes
-	chr3:21452293-21457505	1.18944	0.147614	-8.05777	0.00488847	yes
CORO6	chr17:27920526-27949916	23.4944	2.92082	-8.04377	0.0103646	yes
FLJ43390	chr14:62583911-62600903	2.89561	0.360238	-8.03805	0.000189481	yes
GLS	chr2:191745546-191830276	58.9162	7.35193	-8.01371	0.00070686	yes
SMYD2	chr1:214454564-214510681	31.9475	3.99261	-8.00166	0.000358261	yes
LRFN2	chr6:40359372-40555126	2.52519	0.315712	-7.9984	0.0067104	yes
-	chr8:142732661-142737547	0.612234	0.0766837	-7.98389	0.0419382	yes
STX1B	chr16:31000574-31021829	46.5594	5.83353	-7.98134	0.00356159	yes
BEX5	chrX:101408674-101410986	81.6152	10.2325	-7.97608	4.12403e-05	yes
SLC6A11	chr3:10857916-10982407	8.35474	1.04938	-7.9616	0.00142533	yes
SCN3A	chr2:165944029-166060577	2.65821	0.334061	-7.95726	0.000511441	yes
RTN2	chr19:45988549-46000313	27.8463	3.50815	-7.9376	0.0025947	yes
OPN3	chr1:241695433-241803701	12.3803	1.56131	-7.92943	0.00653394	yes
-	chr17:2624095-2627692	5.26711	0.665526	-7.91421	7.85025e-05	yes
HTR3B	chr11:113769764-113821178	0.814424	0.102976	-7.90887	0.0150813	yes
PAK1	chr11:77032580-77185108	55.5428	7.03144	-7.89921	0.00182047	yes
NME5	chr5:137450860-137475132	10.2046	1.2943	-7.88426	0.000188332	yes
PPARGC1A	chr4:23793596-24093310	3.71224	0.472578	-7.8553	0.000298754	yes
SRSF12	chr6:89805422-89827800	2.0602	0.262603	-7.8453	0.0290017	yes
CSMD1	chr8:2792852-4852328	5.46981	0.699584	-7.81866	0.00157464	yes
OSBPL10	chr3:31702316-32033228	2.34894	0.300611	-7.81389	0.00284344	yes
CLSTN2	chr3:139654026-140296242	3.88093	0.49691	-7.81013	4.98663e-05	yes
-	chr17:17400297-17405938	2.08976	0.268225	-7.79107	0.000503789	yes
BZRAP1	chr17:56378589-56494931	34.2918	4.40239	-7.78936	0.0188818	yes
CLEC4GP1	chr19:7852369-7855968	2.50494	0.321903	-7.78166	0.0450965	yes
LMO7	chr13:76194556-76434006	7.6215	0.98028	-7.77482	0.000660047	yes
CTNNA2	chr2:79740059-80875988	73.8799	9.55021	-7.73595	0.000431897	yes
UBE2T	chr1:202300784-202311094	7.37569	0.95362	-7.73441	0.0231794	yes
TSPYL1	chr6:116575413-116759442	49.3876	6.38604	-7.73368	0.000225367	yes
COL12A1	chr6:75794041-75915671	0.959048	0.12411	-7.7274	0.00969209	yes
-	chr6:47824159-47831055	0.801965	0.103786	-7.7271	0.00963567	yes
-	chr4:570838-578730	4.34908	0.56335	-7.72003	0.0276476	yes
TBC1D9	chr4:141541847-141677471	7.40262	0.960685	-7.70556	0.000401193	yes
MDGA2	chr14:47306910-48144157	1.55724	0.202122	-7.70446	0.0095285	yes
SEMA6B	chr19:4542597-4586081	29.0713	3.77799	-7.69491	0.000660047	yes
RGS6	chr14:72398816-73033239	4.02769	0.52462	-7.67735	0.0123434	yes
SNCG	chr10:88695133-88723017	214.057	27.8866	-7.67598	0.00142928	yes
TESC	chr12:117476727-117537251	25.7397	3.36475	-7.64981	0.0198272	yes
FAM155A	chr13:107819142-108519460	8.64621	1.13131	-7.64265	4.73183e-05	yes
CADM3	chr1:159141376-159173102	64.1886	8.43301	-7.61159	0.00115483	yes
SPTBN4	chr19:40953690-41082369	25.7436	3.38891	-7.59642	0.0274109	yes
SLC39A10	chr2:196440758-196933536	16.9249	2.22879	-7.59376	5.68066e-05	yes
LIMK1	chr7:73497385-73536858	44.8847	5.93966	-7.55678	0.000331174	yes
RARB	chr3:25469753-25639422	3.20459	0.424764	-7.5444	0.0336035	yes
SLIT2	chr4:20253719-20623757	6.28138	0.834917	-7.52336	0.0130882	yes
PNMA2	chr8:26362195-26371483	47.2104	6.27663	-7.52162	0.00047525	yes
TUBA8	chr22:18593452-18614498	15.5185	2.06858	-7.50201	0.00341964	yes
FRMPD2P1	chr10:48844035-48862688	3.53082	0.470956	-7.49713	0.00587542	yes
PRKAA2	chr1:57110989-57181008	1.94526	0.259642	-7.49209	5.06758e-05	yes
MPP6	chr7:24613048-24797639	2.52431	0.337567	-7.47795	0.0037337	yes
FNDC5	chr1:33327868-33338082	10.4863	1.40442	-7.46664	0.00356159	yes
QPCT	chr2:37571752-37600465	6.15145	0.825168	-7.45478	0.00113803	yes
ANKRD29	chr18:21178888-21242849	6.42654	0.862796	-7.4485	0.0126559	yes
PDE4A	chr19:10527448-10580307	11.1079	1.49388	-7.4356	0.00166368	yes
SCG3	chr15:51973549-52013223	55.4095	7.45219	-7.43533	8.65198e-06	yes
CDYL2	chr16:80631795-80838261	2.55992	0.34439	-7.4332	0.000896328	yes
BAI1	chr8:143531413-143626369	38.8709	5.2304	-7.43173	0.0025112	yes
-	chr7:64958935-65019665	0.497033	0.0668943	-7.43012	0.0173372	yes
SLC25A22	chr11:790474-798269	37.81	5.0936	-7.42304	0.000210112	yes
PPP4R4	chr14:94640648-94746072	4.34811	0.587288	-7.40371	0.0200461	yes
KLF5	chr13:73633141-73651676	1.22188	0.165079	-7.40179	0.0191532	yes
MAP9	chr4:156263806-156298125	6.36467	0.860187	-7.39917	4.88899e-05	yes
C15orf27	chr15:76352293-76497304	2.33271	0.315671	-7.38969	0.0427732	yes
-	chr19:50577974-50579170	5.68174	0.769145	-7.38709	0.0146704	yes
ESYT3	chr3:138153414-138200264	1.4058	0.191779	-7.33031	0.0367016	yes
-	chr2:183773601-183779185	0.690137	0.0943597	-7.3139	0.0263542	yes
-	chr15:74027760-74030109	5.21841	0.714349	-7.30513	0.00108559	yes
XK	chrX:37545132-37591383	2.07712	0.284701	-7.29579	0.00070686	yes
WDR17	chr4:176986984-177104308	3.23661	0.447433	-7.23373	0.000415612	yes
SEPT3	chr22:42372930-42394231	73.0487	10.1182	-7.21954	0.0110618	yes
GPR153	chr1:6307405-6321035	4.06033	0.562672	-7.21616	0.00209096	yes
TSPAN7	chrX:38420730-38548215	372.06	51.6755	-7.19993	0.037608	yes
KNDC1	chr10:134973970-135039918	36.7913	5.11683	-7.19025	0.00213522	yes
RASD2	chr22:35936319-35950050	12.9855	1.80758	-7.18391	0.00070686	yes
MPPED2	chr11:30404967-30607955	5.78554	0.805922	-7.17878	0.00648277	yes
GRIK2	chr6:101846860-102517958	7.00982	0.978983	-7.16031	0.000722	yes
STAR	chr8:37998344-38008710	2.33685	0.326486	-7.15758	0.00414707	yes
NUDT4	chr12:93771700-93797024	30.1888	4.25399	-7.09658	4.01103e-05	yes
-	chr3:76603730-76605703	1.87342	0.264025	-7.09562	0.0496553	yes
NSFP1	chr17_ctg5_hap1:1524912-1574839	8.42546	1.19045	-7.07754	0.0253628	yes
DSP	chr6:7541869-7586946	1.79769	0.255705	-7.03033	0.0138614	yes
KCNJ12,KCNJ18	chr17:21279698-21323179	1.74118	0.248259	-7.01356	0.00894637	yes
CA4	chr17:58227301-58249908	8.23603	1.17443	-7.01279	0.0280601	yes
DYNLT3	chrX:37698088-37706889	37.5778	5.36082	-7.00971	9.47865e-06	yes
SLITRK5	chr13:88324360-88332031	4.94375	0.706043	-7.00205	0.000378706	yes
CACNB1	chr17:37329708-37353956	23.4016	3.35061	-6.98428	0.0166841	yes
RBM24	chr6:17281808-17294099	2.14465	0.307449	-6.97563	0.0215919	yes
-	chr14:47295075-47303744	0.520399	0.0747403	-6.96276	0.020616	yes
IGLON5	chr19:51815101-51834102	6.11074	0.878768	-6.95376	0.000855527	yes
CAMTA1	chr1:6845383-7829766	7.80703	1.12717	-6.92622	0.0419893	yes
GFOD1	chr6:13357908-13487869	11.3407	1.63843	-6.92169	0.0401027	yes
GRIA2	chr4:158141735-158291669	41.5802	6.01475	-6.91304	0.00264644	yes
MIR138-1	chr3:44154869-44163924	4.8371	0.704437	-6.86662	3.2043e-05	yes
CACNA1C	chr12:2162415-2807231	1.74365	0.254114	-6.86168	0.0243967	yes
MARK1	chr1:220701567-220837799	5.74982	0.841995	-6.82881	0.000432967	yes
MIR138-2	chr16:56892088-56896314	1.14665	0.168163	-6.81868	0.0190819	yes
GJB2	chr13:20761603-20767114	2.78445	0.408554	-6.81538	0.00961857	yes
-	chr6:165202551-165205724	1.52611	0.223974	-6.81378	0.0275875	yes
DMRTC1B	chrX:72091858-72095622	6.06824	0.891126	-6.80963	0.0124044	yes
PCDH20	chr13:61983110-62002225	2.45272	0.360403	-6.80549	0.00350754	yes
NOS2	chr17:26083791-26127555	1.44686	0.212626	-6.80472	0.012641	yes
EIF5A2	chr3:170603037-170626426	3.68026	0.541352	-6.79828	0.000659218	yes
PLCH1	chr3:155197544-155422051	2.93614	0.433164	-6.77836	0.00541267	yes
DCAF6	chr1:167885912-168045083	36.6664	5.41837	-6.76705	0.046803	yes
LAMB1	chr7:107564245-107643848	4.31944	0.639082	-6.75882	0.00233337	yes
-	chrX:23419233-23422480	1.6427	0.243155	-6.75577	0.0147792	yes
CHAC1	chr15:41245635-41248717	4.89641	0.725624	-6.74786	0.0474712	yes
PLCB4	chr20:9049700-9461872	2.44922	0.363104	-6.74523	0.00462313	yes
SLC7A8	chr14:23594503-23652856	10.382	1.53997	-6.74169	0.00310566	yes
LINC00087	chrX:134225281-134232733	11.1897	1.66188	-6.73316	0.00123678	yes
CACNA1A	chr19:13317043-13617274	29.0241	4.32089	-6.71716	0.0184221	yes
AP3B2	chr15:83211949-83378635	23.8238	3.55041	-6.71015	0.0282769	yes
R3HDM1	chr2:136289028-136482842	49.058	7.31418	-6.70725	0.00277843	yes
-	chr5:43712174-43718014	0.601483	0.0897482	-6.70189	0.0406687	yes
SYT3	chr19:51125233-51143092	9.38478	1.40183	-6.69466	0.00850346	yes
ODZ1	chrX:123509755-124097666	0.692257	0.103415	-6.69397	0.0228638	yes
ETV1	chr7:13930855-14031050	4.80062	0.717518	-6.69059	0.00112384	yes
CPNE8	chr12:39046001-39299420	5.23254	0.782129	-6.69012	0.00746645	yes
DDX25	chr11:125773259-125798993	10.4348	1.57086	-6.64273	0.00492282	yes
FBXL2	chr3:33318933-33429360	11.175	1.6856	-6.62969	0.00228674	yes
JAKMIP1	chr4:6027925-6202318	22.3081	3.3667	-6.6261	0.000163274	yes
RSPO2	chr8:108911543-109095913	5.38932	0.814626	-6.6157	0.000476309	yes
NT5DC3	chr12:104166080-104234975	4.44561	0.674435	-6.59161	0.000412659	yes
DAGLA	chr11:61447904-61514476	8.46126	1.28373	-6.59115	0.00276743	yes
CSRNP3	chr2:166326156-166546164	3.68584	0.559967	-6.58225	0.000508621	yes
ARHGAP26	chr5:142146540-142608600	8.63044	1.31333	-6.57142	9.10282e-05	yes
ZNF697	chr1:120161999-120190390	1.05023	0.160531	-6.54223	0.013035	yes
-	chr5:177388060-177389212	5.17556	0.791417	-6.53961	0.0190144	yes
CNTN3	chr3:74311719-74662971	3.68956	0.564603	-6.53479	0.00458749	yes
DMRTC1	chrX:72064875-72068636	5.74925	0.880983	-6.52595	0.016068	yes
TBC1D30	chr12:65218351-65274798	2.34109	0.358817	-6.52447	0.00372411	yes
CNTNAP1	chr17:40834631-40852012	56.375	8.67429	-6.49909	0.0038228	yes
MYH10	chr17:8377522-8534079	33.2852	5.12863	-6.49008	0.00424324	yes
CCDC34	chr11:27358712-27384795	8.86645	1.36616	-6.49005	0.00633417	yes
LOC100287482	chr7:129142319-129152773	4.42828	0.682675	-6.48666	0.0303846	yes
BRWD1	chr21:40555854-40685712	26.3061	4.05589	-6.4859	0.0114799	yes
CERS6	chr2:169312758-169642939	7.76307	1.19777	-6.48127	9.94634e-05	yes
NRSN1	chr6:24126413-24147757	35.1306	5.42777	-6.47238	0.00421048	yes
ATP8A2	chr13:25946208-26599990	6.38048	0.98867	-6.4536	0.00149153	yes
FAM5B	chr1:177139963-177251586	13.4178	2.08075	-6.44854	0.00495283	yes
LMO4	chr1:87794150-87814608	52.5329	8.15185	-6.44429	0.00384681	yes
KIAA1522	chr1:33207511-33240731	11.3654	1.76423	-6.44213	0.0025112	yes
CCDC3	chr10:12938624-13091867	16.5783	2.57924	-6.42759	0.000896328	yes
OGDHL	chr10:50942686-50970425	21.6638	3.37059	-6.4273	0.00180836	yes
RAB6B	chr3:133542864-133614691	48.3942	7.60661	-6.36212	0.0147347	yes
GPR162	chr12:6930962-6936583	56.5839	8.9151	-6.34697	0.00144558	yes
ADRB1	chr10:115803805-115806667	4.0783	0.64733	-6.30019	0.0018424	yes
SEZ6L	chr22:26565439-26779564	11.3062	1.79596	-6.29535	0.0105672	yes
-	chr9:15163618-15166968	4.74224	0.754117	-6.28847	0.000758191	yes
KCNC3	chr19:50815213-50832634	13.9877	2.2246	-6.28774	0.0043133	yes
MZT1	chr13:73282494-73301938	11.1419	1.77388	-6.28109	8.81726e-05	yes
RGS14	chr5:176784832-176799599	8.13645	1.29856	-6.26575	0.0085041	yes
SORCS3	chr10:106400858-107024993	2.68172	0.428215	-6.26256	0.00976884	yes
SLC16A14	chr2:230899634-230933715	5.44303	0.869423	-6.26051	0.00435275	yes
CELF2	chr10:11047258-11378672	16.137	2.59221	-6.22519	0.000503789	yes
PDXP	chr22:38054736-38062939	79.2833	12.7716	-6.20778	4.36529e-05	yes
SLC9A5	chr16:67282854-67306113	3.38017	0.545217	-6.19968	0.0478409	yes
RAPGEFL1	chr17:38334241-38351906	20.3097	3.27792	-6.19591	6.18517e-05	yes
PABPC1L2B	chrX:72223100-72227662	4.15562	0.672774	-6.17684	0.0275875	yes
RAB3B	chr1:52373627-52456436	0.709125	0.11481	-6.17651	0.00380299	yes
VPS13A	chr9:79791671-80036609	4.9493	0.801994	-6.17124	0.00476783	yes
FAM102B	chr1:109102970-109181949	5.19224	0.841773	-6.16822	0.000104394	yes
LSM11	chr5:157170139-157187807	3.65507	0.593908	-6.15427	0.00104018	yes
PPARGC1B	chr5:149109814-149234585	0.883773	0.143905	-6.14136	0.00704972	yes
AMIGO1	chr1:110046799-110052336	11.1625	1.82	-6.13324	0.00251842	yes
SLC4A4	chr4:72053002-72437804	8.6161	1.4082	-6.11852	0.000104632	yes
KCTD1	chr18:24034874-24283602	29.2974	4.79162	-6.1143	0.00511645	yes
NETO2	chr16:47115430-47177936	3.90768	0.639293	-6.1125	0.0418458	yes
ATCAY	chr19:3880617-3928080	31.2443	5.11317	-6.11055	0.000806885	yes
GNB5	chr15:52412887-52483565	14.9544	2.45443	-6.09282	0.00070686	yes
OXR1	chr8:107282405-107764921	39.6113	6.51692	-6.07822	0.00849956	yes
C1orf212,DLGAP3	chr1:35313944-35395120	20.7002	3.40824	-6.07357	0.0438546	yes
LOC255167	chr5:6582250-6589321	1.97595	0.325721	-6.06639	0.0324142	yes
PPFIA3	chr19:49622662-49654283	15.3339	2.5289	-6.06347	0.00091549	yes
SGTB	chr5:64920557-65125126	11.1115	1.83767	-6.04652	0.0241539	yes
ZCCHC12	chrX:117957786-117960931	4.92477	0.819042	-6.01284	0.00412743	yes
LY6H	chr8:144239330-144242053	109.54	18.223	-6.01108	0.000413946	yes
PARP8	chr5:49961138-50142356	2.61238	0.435075	-6.00444	0.00787561	yes
TNFAIP8L3	chr15:51348798-51397473	4.73155	0.789276	-5.9948	0.0190314	yes
TRIM37	chr17:56833231-57184266	21.6873	3.6204	-5.9903	0.0179931	yes
SHISA9	chr16:12995476-13334429	2.97031	0.49767	-5.96843	0.0148674	yes
SLC1A1	chr9:4490426-4587469	8.17948	1.37097	-5.9662	0.000722	yes
CHRD	chr3:184097860-184107617	12.8531	2.15893	-5.95346	0.00297193	yes
EFR3A	chr8:132916355-133025886	24.3347	4.10039	-5.93473	0.000459033	yes
PABPC1L2A	chrX:72296637-72299351	4.39682	0.741384	-5.93056	0.0419711	yes
SLITRK3	chr3:164895267-164914469	2.8784	0.486533	-5.91615	0.0105267	yes
-	chr13:112742382-112765281	4.14645	0.701856	-5.90784	0.0112986	yes
STXBP5	chr6:147162524-147711612	6.73361	1.14064	-5.90336	0.00150194	yes
EFNA3	chr1:155051347-155060179	13.1645	2.23208	-5.89786	0.0187878	yes
ELK1	chrX:47494919-47510003	19.4252	3.29441	-5.89641	0.00198608	yes
GAP43	chr3:115342150-115440334	241.046	40.9421	-5.88749	0.0200461	yes
NAP1L3	chrX:92925924-92928682	54.9466	9.34916	-5.87717	0.000371631	yes
ZFPM2	chr8:106331146-106816767	2.79412	0.475982	-5.87022	0.00354456	yes
CPEB3	chr10:93806336-94050875	6.01178	1.02778	-5.84929	0.00227321	yes
ME3	chr11:86145965-86383678	15.8902	2.72291	-5.83574	0.00289063	yes
SIDT1	chr3:113251217-113348603	4.19544	0.719177	-5.83367	0.0230755	yes
ZDBF2	chr2:207139522-207179515	1.85969	0.318926	-5.8311	0.00952402	yes
LHX2	chr9:126762478-126795582	41.9461	7.19417	-5.83057	0.00310182	yes
RLBP1	chr15:89753097-89765130	6.0034	1.02965	-5.83052	0.0105263	yes
GPRIN1	chr5:176022802-176037131	6.44421	1.11426	-5.7834	0.00049264	yes
NPAS2	chr2:101436612-101613543	10.1176	1.74963	-5.78271	0.0114372	yes
MAGEE1	chrX:75648045-75651903	11.9753	2.07214	-5.77919	0.00140076	yes
CYB561	chr17:61509664-61523722	12.78	2.21811	-5.76166	0.0030347	yes
MFSD4	chr1:205538111-205572046	18.4893	3.21225	-5.75587	0.000153993	yes
LOC100507421	chr7:140774031-141180179	3.66284	0.638968	-5.73243	0.000141734	yes
DBNDD1	chr16:90071270-90114191	40.7204	7.12568	-5.7146	0.0231079	yes
RNF150	chr4:141780946-142054616	1.96999	0.345645	-5.69946	0.000502063	yes
CA10	chr17:49707673-50237377	23.7395	4.16539	-5.69923	0.00242246	yes
GPC5	chr13:92050934-93522392	2.73067	0.480607	-5.68171	0.0483529	yes
RFK	chr9:79000432-79009444	19.3258	3.40456	-5.67645	0.000936577	yes
KIAA1217	chr10:23983674-24836772	3.73733	0.659774	-5.66456	0.0151112	yes
CAMK2N2	chr3:183967444-184010819	32.0748	5.67709	-5.64987	0.00255033	yes
STMN3	chr20:62271060-62284780	148.553	26.3002	-5.64836	0.00321318	yes
LOC100506123	chr2:98081675-98091049	6.2505	1.10751	-5.64374	0.000463028	yes
TOX	chr8:59717976-60031767	4.93449	0.879037	-5.61352	0.000638668	yes
-	chr12:78130174-78136871	2.21405	0.394575	-5.61123	0.00252766	yes
SLC41A2	chr12:105195454-105352068	2.20091	0.392343	-5.60966	0.0117138	yes
-	chr8:56447991-56454846	1.26891	0.226272	-5.6079	0.00805749	yes
BK250D10.8	chr22:42348190-42354946	18.3123	3.27233	-5.5961	0.00648277	yes
ACBD7	chr10:15117473-15130775	26.2224	4.69097	-5.58997	0.000400146	yes
ADARB1	chr21:46494492-46646478	10.2034	1.82861	-5.57987	0.0180362	yes
ADORA2B	chr17:15848230-15879210	4.05891	0.729829	-5.56145	0.0201014	yes
SEPT6	chrX:118749687-118827333	11.2456	2.0222	-5.56107	0.00278705	yes
-	chr11:121899063-121899378	23.2648	4.18426	-5.56008	0.0473629	yes
DLG3	chrX:69664704-69725339	11.1056	2.00045	-5.55155	0.00310126	yes
ATP6V1A	chr3:113465865-113530906	33.3281	6.01343	-5.54228	0.00118332	yes
LHX6	chr9:124964855-124991091	4.16768	0.752277	-5.54009	0.0494974	yes
-	chr6:36110819-36112334	3.56612	0.643931	-5.53805	0.0276705	yes
CIT	chr12:120123594-120315095	31.4415	5.68796	-5.52773	0.00213143	yes
RND1	chr12:49250915-49259653	22.2129	4.02065	-5.5247	0.00378042	yes
VILL	chr3:38035077-38048676	13.8961	2.52199	-5.50997	0.0496313	yes
C2CD4C	chr19:405437-409170	6.92329	1.25711	-5.50731	0.00246455	yes
LOC728730	chr2:39664556-39828484	2.40753	0.437309	-5.50533	0.0146727	yes
FBXW7	chr4:153242409-153456172	47.15	8.56871	-5.50258	0.000967859	yes
MYO1B	chr2:192110106-192290115	6.27434	1.14165	-5.49585	0.00267341	yes
NEGR1	chr1:71868624-72748277	14.5395	2.64666	-5.49353	4.56904e-05	yes
LGI1	chr10:95517565-95558107	20.509	3.73394	-5.49259	0.00488847	yes
RAB37	chr17:72667255-72743474	5.67207	1.03304	-5.49066	0.0483529	yes
SCN2B	chr11:118033518-118047345	18.2494	3.32581	-5.4872	0.00244784	yes
RBP4	chr10:95351592-95361154	29.3239	5.34419	-5.48706	0.00214793	yes
PKNOX2	chr11:125034558-125303469	7.8923	1.43889	-5.48499	0.000873359	yes
C6orf115	chr6:139349620-139364439	16.2532	2.96582	-5.48017	0.00809493	yes
OPRL1	chr20:62711470-62731996	6.04203	1.10327	-5.47647	0.0154725	yes
FZD3	chr8:28351721-28431920	3.4797	0.635731	-5.47354	0.000405271	yes
GRAMD1C	chr3:113557680-113666021	4.95689	0.909196	-5.45195	0.00322875	yes
EPDR1	chr7:37960162-37991542	24.8558	4.57485	-5.43314	0.0376708	yes
RAB9B	chrX:103077254-103087212	4.55151	0.838082	-5.43086	0.000858874	yes
LOC283683	chr15:23094330-23115254	10.6815	1.9765	-5.40425	0.00155363	yes
RUNX1T1	chr8:92967194-93115454	2.4052	0.448418	-5.36375	0.00492253	yes
STK17B	chr2:196998306-197036336	1.42778	0.267112	-5.34525	0.0117952	yes
PLXNA2	chr1:208195585-208417665	7.32822	1.37969	-5.3115	0.00698621	yes
LZTFL1	chr3:45864827-45883621	9.21974	1.73827	-5.30397	0.00249393	yes
RANBP3L	chr5:36246885-36302029	9.82402	1.85724	-5.28958	0.0171938	yes
-	chr1:793186-795282	5.80263	1.09913	-5.27929	0.00451456	yes
FSTL5	chr4:162305046-163085186	1.60799	0.305386	-5.26543	0.0380345	yes
EML6	chr2:54952148-55199156	2.26571	0.430499	-5.26299	0.00133292	yes
TMTC1	chr12:29653650-29937692	3.73751	0.710156	-5.26294	0.00605987	yes
KRT17	chr17:39775691-39780882	4.77237	0.906992	-5.26176	0.0215413	yes
ATP6V1C1	chr8:103876585-104085285	23.2216	4.42242	-5.25088	0.00261451	yes
HMGCLL1	chr6:55299170-55444012	3.82004	0.731542	-5.2219	0.0190501	yes
PRKAG2	chr7:151253169-151576308	17.1729	3.30447	-5.19687	0.00571343	yes
DZIP1	chr13:96085852-96296957	7.57519	1.46081	-5.18561	0.0402485	yes
LRP8	chr1:53692563-53793821	6.17219	1.19365	-5.17085	0.0198272	yes
NYAP1	chr7:100081287-100092422	18.1579	3.51192	-5.17036	0.0467744	yes
DGKE	chr17:54911459-54946927	2.77878	0.537749	-5.16743	0.0259848	yes
KIFC2	chr8:145691737-145701718	61.0959	11.8379	-5.16104	0.00203212	yes
STRBP	chr9:125871772-126030855	12.5567	2.43352	-5.15989	0.00539298	yes
GRIN2A	chr16:9847261-10276611	7.89747	1.54006	-5.12803	0.00284751	yes
CYCS	chr7:25158101-25164980	61.4358	12.0008	-5.11931	0.0279889	yes
-	chr16:758268-765061	1.57444	0.308231	-5.10799	0.00670827	yes
LINGO1	chr15:77904815-78111635	48.4643	9.49927	-5.1019	0.0149823	yes
KITLG	chr12:88886377-88974250	5.28478	1.03633	-5.09951	0.0146761	yes
PLXDC1	chr17:37213271-37308841	4.40922	0.865103	-5.09676	0.0226041	yes
PDE3B	chr11:14665268-14893604	1.34454	0.264019	-5.09259	0.00737735	yes
NDUFA5	chr7:123181082-123197958	100.052	19.6553	-5.09033	0.00148791	yes
TOX2	chr20:42543491-42698260	6.27238	1.23438	-5.0814	0.0151765	yes
STAU2	chr8:74332308-74659943	21.8444	4.30066	-5.07931	0.0200136	yes
-	chrX:23093713-23096503	12.8526	2.53084	-5.07839	0.000406202	yes
INPP5F	chr10:121485558-121588879	44.8745	8.8472	-5.07217	0.00260972	yes
DPY19L2	chr12:63952692-64062804	4.69624	0.931784	-5.04005	0.0447798	yes
GPR123	chr10:134901408-134945179	10.5926	2.10252	-5.03805	0.00492282	yes
MDH1	chr2:63347876-63834330	301.557	59.8701	-5.03685	0.0472763	yes
UCHL1	chr4:41258897-41270446	511.799	103.203	-4.95915	0.0367016	yes
CLIC2	chrX:154505499-154564097	2.67023	0.5386	-4.95772	0.0467776	yes
SLC4A3	chr2:220492291-220506702	15.1783	3.06426	-4.95333	0.00157464	yes
ATP6V1B2	chr8:20054703-20079708	132.38	26.7527	-4.94829	0.0219821	yes
SLC29A4	chr7:5322560-5343704	7.4299	1.50175	-4.94749	0.0259212	yes
TNFAIP8L1	chr19:4639526-4655580	7.02763	1.4234	-4.93721	0.00141163	yes
LHFPL4	chr3:9540044-9595486	7.67736	1.56125	-4.91744	0.00130016	yes
LRP3	chr19:33668509-33716756	35.831	7.29407	-4.91235	0.00812165	yes
GALNTL1	chr14:69726472-69822429	16.792	3.42495	-4.90285	0.0136992	yes
PDE2A	chr11:72287183-72385497	32.4308	6.6563	-4.8722	0.00608199	yes
SYNJ1	chr21:34000992-34100351	16.6141	3.41474	-4.86541	0.011558	yes
GOLGA7B	chr10:99609994-99790585	16.2734	3.35162	-4.85538	0.00430327	yes
RHOBTB2	chr8:22844929-22941132	19.088	3.9614	-4.8185	0.00784358	yes
PCP4	chr21:41239346-41301322	92.13	19.3077	-4.77167	0.000960816	yes
SHISA6	chr17:11144739-11467380	1.63109	0.342146	-4.76723	0.0104876	yes
PPL	chr16:4932507-4987136	2.21847	0.466139	-4.75925	0.0147347	yes
B3GALNT1	chr3:160801670-160823160	8.73891	1.83883	-4.75243	0.0137026	yes
SLC9A6	chrX:135067582-135142685	26.3422	5.55295	-4.74382	0.0133812	yes
CHRDL1	chrX:109917083-110039286	5.12992	1.08523	-4.72703	0.00414125	yes
LONRF2	chr2:100888218-100939363	8.66348	1.83575	-4.71931	0.00266249	yes
ZNF503	chr10:77157602-77168740	3.85186	0.817314	-4.71283	0.0169462	yes
UBASH3B	chr11:122526397-122685187	1.11471	0.236801	-4.70737	0.0197913	yes
CXorf1	chrX:144908927-144911370	2.06647	0.439083	-4.70633	0.0310766	yes
BMPR2	chr2:203241049-203432474	7.33892	1.55939	-4.70628	0.000415743	yes
FHOD3	chr18:33877701-34361884	5.84389	1.24658	-4.68794	0.0337069	yes
CADM2	chr3:85008132-86123580	19.033	4.06256	-4.68498	0.00633417	yes
SGPP2	chr2:223288636-223427742	3.95337	0.843911	-4.68458	0.00291649	yes
TBC1D4	chr13:75858808-76056250	8.48419	1.82121	-4.65855	0.0496553	yes
-	chr3:117351201-117358709	2.63692	0.56723	-4.64877	0.00808649	yes
SCAI	chr9:127703677-127905838	3.63917	0.784598	-4.63826	0.00321638	yes
AKAP12	chr6:151561133-151679694	12.7329	2.74747	-4.63441	0.00155552	yes
CD83	chr6:14117486-14137148	10.5228	2.27063	-4.63431	0.0124044	yes
BAG4	chr8:38020838-38070819	10.0434	2.17364	-4.62054	0.0125195	yes
PNMA6C,PNMA6D	chrX:152240726-152243402	10.025	2.17567	-4.60778	0.00334297	yes
MOAP1	chr14:93648540-93651249	59.718	12.9691	-4.60464	0.00549208	yes
SERPINF1	chr17:1665258-1681287	20.1968	4.38758	-4.60318	0.0332077	yes
ANKRD32	chr5:93954390-94031573	2.51537	0.546514	-4.60257	0.0104876	yes
KIAA1797	chr9:20658308-20996641	7.00476	1.52272	-4.60016	0.0021245	yes
LPCAT4	chr15:34651088-34659404	48.9632	10.6525	-4.5964	0.0211287	yes
SNX32	chr11:65601409-65621172	10.4639	2.28034	-4.58875	0.00605987	yes
PITPNM2	chr12:123467661-123635355	8.16661	1.78318	-4.5798	0.0178337	yes
ENPP5	chr6:46126128-46138729	6.51372	1.42405	-4.57408	0.015105	yes
NTN4	chr12:96051581-96226834	8.88478	1.94272	-4.57337	0.0197516	yes
EPHB1	chr3:134513612-134979307	2.97671	0.653156	-4.55743	0.0379507	yes
DBC1	chr9:121928907-122131739	16.1585	3.54611	-4.55668	0.00099895	yes
HRH1	chr3:11178778-11304939	1.98947	0.436748	-4.55519	0.0171938	yes
RHBDL1	chr16:725800-728267	16.9433	3.72118	-4.55321	0.019382	yes
CSDC2	chr22:41957013-41972670	9.1981	2.02381	-4.54494	0.00316186	yes
OXCT1	chr5:41730095-41872330	33.3492	7.35221	-4.53594	0.0145591	yes
PDZRN3	chr3:73431501-73674072	5.32418	1.1754	-4.52968	0.0367016	yes
LRRC16A	chr6:25279655-25620758	3.50789	0.781252	-4.49009	0.00480569	yes
KIAA1549	chr7:138516126-138666064	1.55123	0.345737	-4.48673	0.00632696	yes
LYPD6	chr2:150186498-150330659	2.0426	0.455396	-4.48533	0.0259118	yes
CNTNAP2	chr7:145813452-148118092	15.621	3.4841	-4.48351	0.00904956	yes
CAMK2G	chr10:75572179-75634349	81.3282	18.2274	-4.46187	0.0427253	yes
SMS	chrX:21958714-22013670	18.6479	4.18108	-4.46007	0.00400673	yes
SLC25A12	chr2:172635493-172750813	14.4103	3.23225	-4.45829	0.00947597	yes
ABCC8	chr11:17414431-17498631	8.70151	1.95534	-4.45013	0.021677	yes
NCKAP1	chr2:183789588-183903229	81.1608	18.2635	-4.44388	0.0302552	yes
SLC8A1	chr2:40144773-40739575	2.84915	0.641352	-4.44241	0.0229661	yes
CITED2	chr6:139693396-139695785	12.0443	2.71354	-4.43859	0.0142179	yes
NRG3	chr10:83635069-84754309	5.02501	1.13341	-4.43353	0.0296682	yes
-	chr8:24766822-24769134	3.56134	0.803643	-4.4315	0.0274881	yes
ZNF238	chr1:244212164-244220863	36.0348	8.16523	-4.4132	0.00662717	yes
IGSF21	chr1:18434239-18704979	48.6955	11.0344	-4.41306	0.0184022	yes
E2F3	chr6:20402136-20493945	2.28524	0.519159	-4.40181	0.0272835	yes
ETS2	chr21:40177230-40196881	32.5838	7.40483	-4.40034	0.00607879	yes
SLC35F1	chr6:118228688-118638839	10.3407	2.3513	-4.39787	0.00106202	yes
FABP3	chr1:31838099-31845923	42.9918	9.78767	-4.39244	0.00199284	yes
SPATS2	chr12:49760687-49921207	8.36796	1.90643	-4.38934	0.0317192	yes
-	chr15:25267605-25281641	14.1808	3.23188	-4.38779	0.00607879	yes
-	chr1:40116911-40120588	2.24136	0.512936	-4.36967	0.0312051	yes
NR2E1	chr6:108487214-108510013	6.18829	1.41716	-4.36668	0.0100219	yes
DGKZ	chr11:46354454-46402104	40.1013	9.18619	-4.36539	0.015222	yes
DMXL2	chr15:51739920-51914967	7.02755	1.61	-4.36494	0.0033864	yes
PTPRN2	chr7:157331748-158380482	39.6207	9.08009	-4.36347	0.0219884	yes
RAPH1	chr2:204298334-204400058	2.54978	0.58566	-4.35369	0.00756048	yes
NGEF	chr2:233741459-233877951	55.6115	12.7854	-4.34961	0.0249217	yes
RYR2	chr1:237205701-237997456	8.46081	1.94907	-4.34095	0.00976452	yes
MAPK11	chr22:50702141-50708779	34.9487	8.10859	-4.31008	0.0177532	yes
PPP3CB	chr10:75196299-75255782	54.9959	12.7887	-4.30035	0.0286815	yes
MCF2L2	chr3:182893911-183146627	20.1613	4.71191	-4.2788	0.00996539	yes
PNMAL2	chr19:46984044-47104457	24.2877	5.67984	-4.27612	0.00907515	yes
KIAA1467	chr12:13197314-13236383	12.6144	2.95109	-4.27449	0.00213143	yes
CLDN12	chr7:90032647-90045268	7.64345	1.79029	-4.26939	0.0023771	yes
PITPNM1	chr11:67259238-67272843	16.4423	3.85465	-4.26558	0.0126559	yes
NRCAM	chr7:107788070-108096841	38.4653	9.03537	-4.25719	0.0230699	yes
HSPA4L	chr4:128703442-128762456	3.86214	0.907467	-4.25596	0.0239791	yes
ARHGEF9	chrX:62854840-63005426	25.05	5.9026	-4.24389	0.0167148	yes
CNST	chr1:246729638-246831902	10.1844	2.40345	-4.23741	0.0259542	yes
ARL4A	chr7:12726451-12730558	6.12603	1.45014	-4.22444	0.025503	yes
HS3ST4	chr16:25703346-26149009	5.72491	1.366	-4.191	0.00784142	yes
ACTR3B	chr7:152456850-152552657	15.0566	3.59608	-4.18695	0.0253508	yes
UGP2	chr2:64068097-64118696	75.0506	17.9583	-4.17916	0.00353845	yes
CISD1	chr10:60028800-60052595	16.6258	3.98388	-4.17327	0.0103228	yes
FOXG1	chr14:29236277-29239483	16.1068	3.87982	-4.15143	0.00107158	yes
ARHGEF25	chr12:58003962-58011028	40.2023	9.70681	-4.14166	0.00867916	yes
NECAB2	chr16:84002236-84036379	24.5434	5.97488	-4.10776	0.00683306	yes
ARHGAP29	chr1:94634345-94703493	2.82029	0.687411	-4.10277	0.0281629	yes
REEP2	chr5:137774775-137782658	82.8574	20.2181	-4.09818	0.0108879	yes
ZC2HC1A	chr8:79578281-79631997	6.96628	1.70067	-4.0962	0.0190144	yes
MEIS3P1	chr17:15689799-15695109	4.3943	1.0749	-4.0881	0.0422521	yes
CX3CL1	chr16:57406350-57418962	24.2357	5.93248	-4.08526	0.0154025	yes
BEND6	chr6:56819772-56892624	21.2313	5.19811	-4.08443	0.0316216	yes
PAM	chr5:102091000-102366808	15.8452	3.88679	-4.07668	0.0368198	yes
SUB1	chr5:32585604-32604188	37.4655	9.19486	-4.07461	0.0054169	yes
CYP1B1	chr2:38294745-38303323	2.26331	0.555904	-4.0714	0.0219861	yes
SBK1	chr16:28270008-28335170	6.92342	1.70095	-4.07033	0.0159214	yes
C1orf21	chr1:184356149-184598155	6.52113	1.6062	-4.05997	0.00094435	yes
CYFIP2	chr5:156693090-156901761	33.2261	8.19115	-4.05634	0.0366652	yes
PTPN4	chr2:120517200-120744495	3.79945	0.937264	-4.05377	0.0164852	yes
AFF3	chr2:100161872-100759037	2.70939	0.668982	-4.05002	0.0243967	yes
SATB2	chr2:200134222-200337481	7.25974	1.793	-4.04893	0.0136992	yes
FAM110B	chr8:58907112-59062277	4.93307	1.21973	-4.0444	0.0240141	yes
PPM1L	chr3:160473866-160799368	4.07974	1.0089	-4.04375	0.00306321	yes
GOT1	chr10:101156626-101190530	76.9237	19.1275	-4.02163	0.013896	yes
WASF1	chr6:110421021-110501207	46.8879	11.66	-4.02126	0.0321334	yes
RASL10B	chr17:34058678-34070740	14.2392	3.54407	-4.01775	0.0175006	yes
KLF12	chr13:74260148-74708066	2.01604	0.501972	-4.01624	0.00310566	yes
PKIA	chr8:79428335-79517502	15.5468	3.88501	-4.00174	0.00355733	yes
LRRFIP1	chr2:238536223-238690783	11.941	2.99179	-3.99126	0.0179968	yes
CRMP1	chr4:5822323-5894785	35.0942	8.84273	-3.96871	0.0110251	yes
RNF208	chr9:140114065-140118095	73.8135	18.6565	-3.95645	0.0190248	yes
CEND1	chr11:787109-790126	143.262	36.2394	-3.95321	0.0257697	yes
PFKM	chr12:48436756-48540187	39.0452	9.89156	-3.94732	0.0209312	yes
RHOJ	chr14:63671101-63760230	5.25084	1.33143	-3.94376	0.0373762	yes
ZNF280B	chr22:22838771-22863597	1.32586	0.336418	-3.94111	0.0412052	yes
FAM126B	chr2:201838434-201936392	4.59408	1.16574	-3.94091	0.00966086	yes
-	chr13:44542570-44545819	51.8047	13.1564	-3.9376	0.0147338	yes
HK1	chr10:71029755-71161638	44.7671	11.3698	-3.93737	0.0131288	yes
KRAS	chr12:25358179-25403854	7.35834	1.87868	-3.91676	0.0028274	yes
STAMBPL1	chr10:90639943-90683259	5.63536	1.44393	-3.90279	0.0223371	yes
ARL4C	chr2:235401685-235405693	11.4639	2.93991	-3.89941	0.00779958	yes
-	chr15:80487846-80544406	2.91824	0.751596	-3.88272	0.00752734	yes
ITM2A	chrX:78615879-78623049	70.0058	18.0402	-3.88054	0.00849486	yes
PCSK1N	chrX:48689496-48693960	178.417	46.1251	-3.86811	0.0131288	yes
SH3BGRL2	chr6:80247312-80414069	13.5893	3.53136	-3.84818	0.0088751	yes
CYP46A1	chr14:100150754-100193650	34.8046	9.09133	-3.82833	0.0126717	yes
ACHE	chr7:100487612-100494600	10.4883	2.76137	-3.79822	0.0444617	yes
PID1	chr2:229888688-230136057	7.87059	2.07414	-3.79463	0.0103912	yes
ASTN1	chr1:176830202-177134024	10.406	2.75786	-3.77322	0.00384377	yes
TRPM2	chr21:45773483-45862964	11.6598	3.09471	-3.76766	0.0481572	yes
PDE7B	chr6:136172833-136516832	3.0089	0.799911	-3.76154	0.0439187	yes
RGS5	chr1:163112088-163291581	44.1347	11.7458	-3.75749	0.0191252	yes
ZNF33B	chr10:43084554-43134004	2.1576	0.574389	-3.75634	0.0297296	yes
UBE2K	chr4:39697758-39784410	15.6959	4.17897	-3.75593	0.00979009	yes
IGSF3	chr1:117117028-117210314	1.27107	0.339123	-3.74811	0.0449612	yes
ROCK2	chr2:11319744-11485454	14.8713	3.97029	-3.74565	0.0158704	yes
TSHZ3	chr19:31765850-31840190	2.4127	0.646257	-3.73334	0.0226367	yes
FAM43B	chr1:20878931-20881513	5.80363	1.56134	-3.71708	0.0266886	yes
RAB11FIP5	chr2:73300509-73340146	17.8857	4.82724	-3.70516	0.0288427	yes
TRUB1	chr10:116697951-116737985	6.92697	1.87366	-3.69703	0.0386854	yes
COBLL1	chr2:165541230-165698292	3.82107	1.03456	-3.69343	0.032548	yes
FBXO33	chr14:39865153-39901704	5.9157	1.60663	-3.68205	0.0142179	yes
ANKRD24	chr19:4183350-4224813	17.6457	4.79419	-3.68064	0.0447198	yes
ISLR	chr15:74445139-74471649	9.07212	2.46624	-3.67852	0.0480925	yes
VAT1L	chr16:77822482-78014001	10.2698	2.79354	-3.67627	0.0124019	yes
PIK3R3	chr1:46505811-46598708	5.29711	1.44405	-3.66823	0.0186709	yes
RPS6KA3	chrX:20168028-20284770	4.12198	1.12598	-3.66079	0.0224055	yes
PNMAL1	chr19:46969736-46974820	44.2268	12.15	-3.64007	0.0482113	yes
CDO1	chr5:115140429-115152405	20.038	5.50657	-3.63893	0.0201819	yes
PNCK	chrX:152935187-152939816	30.2825	8.38282	-3.61245	0.0208226	yes
MMP16	chr8:89044230-89339717	1.74045	0.481908	-3.61158	0.0112389	yes
-	chr1:160864678-160866305	15.0652	4.1728	-3.61033	0.0131288	yes
-	chr2:8861286-8868071	8.50392	2.36333	-3.59828	0.0346081	yes
C9orf91	chr9:117373705-117408812	9.13302	2.5387	-3.59752	0.0222145	yes
MTPN	chr7:135611372-135662204	44.5366	12.414	-3.58761	0.0185141	yes
LRRK2	chr12:40618812-40763086	3.43302	0.965251	-3.55661	0.0441078	yes
SYNGAP1	chr6:33387846-33421466	5.3642	1.50859	-3.55577	0.0133812	yes
GDAP1	chr8:75262617-75279335	22.9171	6.48812	-3.53216	0.0154898	yes
-	chr19:46927664-46932190	9.02472	2.55982	-3.52553	0.0122765	yes
OLFM2	chr19:9964393-10047076	70.4194	20.0155	-3.51824	0.0300016	yes
NDUFAF4	chr6:97337186-97345767	14.2048	4.05918	-3.49943	0.0203641	yes
DCC	chr18:49866541-51062273	0.859501	0.246086	-3.49269	0.0498147	yes
KIAA1671	chr22:25423940-25593415	5.06378	1.45032	-3.49149	0.0331639	yes
FMN2	chr1:240255184-240638489	10.196	2.9315	-3.47808	0.0153965	yes
GHITM	chr10:85899184-85913311	108.257	31.1583	-3.47442	0.0264864	yes
RASAL2	chr1:178060642-178453273	3.28768	0.946803	-3.4724	0.0357618	yes
RB1CC1	chr8:53535017-53627026	19.5561	5.6455	-3.46402	0.0172159	yes
-	chr13:42807265-42817033	1.38022	0.398797	-3.46096	0.0388297	yes
BAI3	chr6:69345189-70100465	7.06722	2.04903	-3.44906	0.0469306	yes
ZDHHC21	chr9:14610991-14693480	4.28068	1.24186	-3.44699	0.0386171	yes
LMBRD2	chr5:36098555-36152015	6.0465	1.75478	-3.44573	0.0111083	yes
AIFM3	chr22:21319417-21335649	38.8336	11.2756	-3.44404	0.0336035	yes
DCN	chr12:91539034-91576806	23.6408	6.87326	-3.43953	0.0474712	yes
ASPHD2	chr22:26825279-26840978	3.62842	1.05802	-3.42944	0.0480312	yes
LGALSL	chr2:64681326-64688517	4.48191	1.30884	-3.42434	0.0497597	yes
FAM171B	chr2:187558751-187630726	21.1702	6.20244	-3.41321	0.00849486	yes
KIAA0528	chr12:22601441-22697454	21.2027	6.22143	-3.40801	0.0351693	yes
FGD6	chr12:95470524-95611240	1.50249	0.441054	-3.40659	0.0366652	yes
ARHGAP32	chr11:128834953-129149062	10.152	2.98871	-3.39678	0.0298213	yes
FMNL1	chr17:43299291-43324954	9.64869	2.84227	-3.39471	0.0427133	yes
CNRIP1	chr2:68511302-68547183	43.1358	12.7345	-3.38732	0.0215586	yes
SESN3	chr11:94890806-94967546	10.694	3.15731	-3.38706	0.00701695	yes
ELFN2	chr22:37763997-37823505	6.4042	1.90117	-3.36856	0.0159335	yes
NXPH1	chr7:8473584-8792593	4.43027	1.31552	-3.36769	0.0383302	yes
PLCXD3	chr5:41307047-41510730	2.14188	0.636263	-3.36634	0.0232711	yes
LOC283174	chr11:133766329-133771635	6.62395	1.9687	-3.36463	0.0119853	yes
EXTL2	chr1:101337940-101360418	12.6417	3.77832	-3.34585	0.0422635	yes
MAOA	chrX:43515408-43606068	8.8006	2.63185	-3.34388	0.0214317	yes
SLC30A1	chr1:211744923-211752126	8.28474	2.4808	-3.33954	0.00580865	yes
DENND5B	chr12:31535156-31743952	4.63439	1.40359	-3.30181	0.0450071	yes
DDAH1	chr1:85784102-86044046	54.339	16.5294	-3.28742	0.0266085	yes
EFHD2	chr1:15736390-15756839	41.3769	12.643	-3.27271	0.0382962	yes
DLD	chr7:107531585-107561769	14.5455	4.45593	-3.2643	0.0237612	yes
PARVA	chr11:12399025-12556903	4.45441	1.36901	-3.25375	0.0181473	yes
UNC119	chr17:26873724-26879646	23.709	7.29289	-3.25097	0.0433571	yes
SEL1L3	chr4:25749048-25865330	3.08057	0.947844	-3.25008	0.0412052	yes
DBN1	chr5:176883613-176900694	33.538	10.3205	-3.24965	0.0417741	yes
PTPN14	chr1:214521886-214725024	1.54301	0.479944	-3.21498	0.039639	yes
GABRG1	chr4:46037786-46126082	7.46146	2.32172	-3.21376	0.010604	yes
DNAJB14	chr4:100817199-100867879	8.60063	2.67658	-3.21329	0.0264864	yes
NRXN3	chr14:78870092-80331120	13.3754	4.17621	-3.20276	0.0412052	yes
LMTK3	chr19:48988525-49017167	12.9314	4.03926	-3.20143	0.0427344	yes
CCND2	chr12:4357631-4414522	15.4238	4.82691	-3.19538	0.0128251	yes
SPINT2	chr19:38755097-38783254	35.1389	11.0044	-3.19317	0.0176659	yes
TTC33	chr5:40711534-40756072	5.41765	1.69708	-3.19234	0.0207359	yes
SNRK	chr3:43328003-43392634	9.0645	2.85707	-3.17266	0.0398147	yes
HN1	chr17:73131343-73150775	24.0883	7.63204	-3.15621	0.0419893	yes
NKRF	chrX:118722299-118739846	6.88952	2.1929	-3.14174	0.0396628	yes
STK38L	chr12:27397077-27478890	5.4312	1.73215	-3.13553	0.0286905	yes
CACNA2D1	chr7:81575757-82073031	7.8099	2.49092	-3.13535	0.0369822	yes
FBXO34	chr14:55738020-55820329	8.66214	2.77512	-3.12136	0.0259542	yes
TMEM14A	chr6:52535883-52551429	46.9366	15.07	-3.11457	0.0339264	yes
SMAD3	chr15:67358194-67487735	6.81845	2.21454	-3.07895	0.0395859	yes
SCAMP1	chr5:77651385-77776605	13.8406	4.49694	-3.07778	0.0373204	yes
OLA1	chr2:174937174-175113365	11.8646	3.89085	-3.04936	0.0324411	yes
TMX3	chr18:66340924-66382353	10.4058	3.44215	-3.02305	0.0397428	yes
APBA1	chr9:72042448-72287275	15.5627	5.15789	-3.01726	0.0438546	yes
TPRG1L	chr1:3541555-3546694	58.6596	19.4582	-3.01465	0.0319936	yes
ACVR1B	chr12:52345450-52390864	11.3623	3.78277	-3.0037	0.0360969	yes
TSPYL2	chrX:53111541-53117728	58.5432	19.5599	-2.99302	0.0367016	yes
TLK1	chr2:171847332-172087824	13.2275	4.42289	-2.99069	0.0450965	yes
TMEM38A	chr19:16771937-16800853	10.4701	3.51127	-2.98186	0.0476643	yes
RNF6	chr13:26786904-26796508	11.0814	3.71845	-2.98011	0.0447399	yes
TMEM170B	chr6:11538490-11583759	5.48845	1.84285	-2.97824	0.0248543	yes
ZNF25	chr10:38238519-38265453	13.3369	4.546	-2.93377	0.0482113	yes
WASL	chr7:123321996-123389159	18.8533	6.48771	-2.906	0.0412052	yes
PKI55	chr2:217081611-217084915	14.8278	5.15402	-2.87694	0.0310437	yes
SLC1A4	chr2:65215578-65251000	15.1279	5.26218	-2.87484	0.0420573	yes
CAPZA2	chr7:116502562-116559313	28.0781	10.7139	-2.62072	0.0371484	yes
ANKRD13A	chr12:110437234-110477235	6.79167	16.2027	2.38567	0.0496445	yes
-	chr10:52024647-52027107	22.3702	54.8046	2.44989	0.0450071	yes
DIP2B	chr12:50898767-51142476	9.10458	23.1003	2.53722	0.048662	yes
GRHPR	chr9:37422674-37436986	46.9802	119.822	2.55048	0.0471185	yes
SQLE	chr8:126010719-126034525	8.3256	21.3414	2.56335	0.0450071	yes
EHD1	chr11:64620207-64646191	9.27129	23.7783	2.56472	0.0434706	yes
-	chr10:60932766-60936218	6.76465	17.5295	2.59134	0.0427253	yes
MEGF10	chr5:126626455-126796910	4.01473	10.424	2.59644	0.0451777	yes
TOB2	chr22:41829171-41843027	10.2736	26.6985	2.59875	0.0408316	yes
H6PD	chr1:9294862-9331395	2.48713	6.49105	2.60986	0.0473629	yes
TLE4	chr9:82186874-82341656	7.68107	20.3717	2.6522	0.0408316	yes
KLF13	chr15:31619082-31670102	14.5616	39.2136	2.69295	0.0373204	yes
DIXDC1	chr11:111807926-111893998	7.50724	20.2916	2.70294	0.0373251	yes
DOT1L	chr19:2164147-2232577	2.18793	5.98085	2.73357	0.0369626	yes
ABL1	chr9:133589267-133763062	9.60401	26.5393	2.76336	0.0332389	yes
DTX4	chr11:58939715-58980494	6.41518	17.7967	2.77415	0.0468596	yes
PWP2	chr21:45527207-45551063	7.18731	20.0971	2.79619	0.025534	yes
NPC2	chr14:74946642-74960302	43.8595	123.307	2.81141	0.0370569	yes
NENF	chr1:212606228-212619722	85.9031	241.936	2.81638	0.0452962	yes
KIAA0889	chr20:35405841-35492087	4.2238	11.9346	2.82556	0.0449996	yes
LRRC8D	chr1:90286572-90401989	9.09037	25.6904	2.82611	0.0399102	yes
SLC35B2	chr6:44221837-44225283	12.886	36.5484	2.83629	0.0175555	yes
MYH14	chr19:50706884-50813801	11.2983	32.177	2.84795	0.0427713	yes
FADS1	chr11:61566909-61584529	15.44	44.0647	2.85393	0.0104256	yes
NRBP2	chr8:144915754-144923146	26.2575	75.9194	2.89134	0.0255571	yes
TMEM104	chr17:72772621-72835922	2.61621	7.60465	2.90674	0.0336985	yes
LAMP1	chr13:113951468-113977741	48.4322	142.474	2.94172	0.035838	yes
ARHGAP1	chr11:46698549-46722154	19.9032	59.3738	2.98313	0.0171741	yes
UNC5C	chr4:96083655-96473608	2.72409	8.15678	2.99431	0.0354036	yes
PIGT	chr20:44042805-44054884	16.3083	48.8994	2.99844	0.0355764	yes
SLC22A15	chr1:116519118-116616916	3.34327	10.0796	3.01489	0.0480312	yes
RHOU	chr1:228780393-228882416	17.0663	51.5308	3.01945	0.0211168	yes
ANXA1	chr9:75766780-75785307	11.1818	33.7656	3.01969	0.0254539	yes
MAN2A2	chr15:91446134-91465815	17.7283	53.5381	3.01992	0.0409861	yes
TMEM165	chr4:56262089-56292342	20.5664	62.1966	3.02419	0.0424286	yes
TALDO1	chr11:747431-765024	56.9755	172.536	3.02825	0.00857864	yes
RPS6KA1	chr1:26856248-26901520	4.98713	15.1607	3.03996	0.0278146	yes
ERF	chr19:42751716-42759309	8.8509	27.2364	3.07725	0.0213479	yes
HDAC11	chr3:13521714-13548102	38.8049	119.972	3.09167	0.0348568	yes
-	chr7:100735985-100741245	3.78665	11.7671	3.10752	0.0215586	yes
C11orf24	chr11:68028802-68039469	5.89508	18.3232	3.10822	0.0468596	yes
CNKSR3	chr6:154725994-154831922	3.32347	10.3323	3.10889	0.0496921	yes
CLASRP	chr19:45542297-45574214	16.5739	51.6072	3.11376	0.0419893	yes
LIPA	chr10:90973264-91011660	22.4499	69.9822	3.11726	0.0150476	yes
SEC14L5	chr16:5008317-5069467	9.26472	28.8968	3.11901	0.0370798	yes
SLC22A23	chr6:3269205-3456793	8.92799	27.9519	3.13082	0.0116439	yes
DHCR7	chr11:71143446-71159477	15.0627	47.2379	3.13608	0.0164603	yes
TCP11L2	chr12:106696417-106743112	2.95441	9.30496	3.14952	0.0226041	yes
EML2	chr19:46112657-46148775	24.3212	77.4016	3.18247	0.0422521	yes
PTRF	chr17:40554466-40575338	16.5265	52.6603	3.18642	0.0145185	yes
PHLDA3	chr1:201434621-201438299	42.4603	135.461	3.1903	0.0379918	yes
NEO1	chr15:73344824-73597547	6.60605	21.09	3.19253	0.0473629	yes
-	chr13:82264068-82265225	31.0246	99.3383	3.20192	0.00484064	yes
ACSS2	chr20:33462765-33515769	17.5969	56.5166	3.21174	0.0370268	yes
PDIA4	chr7:148700138-148725782	9.68625	31.1907	3.2201	0.0129327	yes
DNM2	chr19:10828728-10942586	18.2776	58.892	3.22209	0.0129201	yes
-	chr17:79361827-79367382	6.83299	22.1253	3.23801	0.0209499	yes
-	chr7:35754703-35760781	7.89238	25.561	3.23869	0.0443131	yes
SYNJ2	chr6:158402887-158589312	12.8027	41.6348	3.25203	0.0218916	yes
FBXO7	chr22:32870706-32897281	34.2744	111.716	3.25946	0.0248645	yes
SORCS2	chr4:7194373-7745372	6.03965	19.7513	3.27027	0.0355764	yes
ADIPOR2	chr12:1772320-1897845	24.1555	79.2182	3.27951	0.0199634	yes
PLD1	chr3:171318019-171528284	3.06183	10.087	3.29444	0.0115522	yes
PSEN1	chr14:73603142-73690399	9.57367	31.5442	3.29489	0.00708059	yes
CYTH1	chr17:76667788-76778376	14.7728	48.8545	3.30706	0.0441566	yes
ST3GAL4	chr11:126225539-126284536	11.5872	38.3256	3.30758	0.0217007	yes
CD82	chr11:44587140-44641855	15.8148	52.4398	3.31587	0.0181875	yes
DDR1	chr6:30851860-30867933	7.96635	26.5085	3.32756	0.0179931	yes
TRAFD1	chr12:112563348-112591408	6.61165	22.1283	3.34687	0.0126559	yes
PACSIN3	chr11:47199072-47208010	11.5232	38.6577	3.35477	0.0310265	yes
C1QB	chr1:22979681-22988029	33.0009	110.849	3.35897	0.019892	yes
KIAA1324L	chr7:86506222-86750672	3.96376	13.3596	3.37044	0.0430996	yes
-	chr4:159185924-159203145	7.04564	23.8275	3.38188	0.0188568	yes
MTUS1	chr8:17501028-17658426	25.4063	86.282	3.39609	0.0228308	yes
NIPAL3	chr1:24742184-24803223	19.1202	65.0401	3.40164	0.0162952	yes
PACRG	chr6:161768367-163745505	1.7353	5.92512	3.41446	0.0419893	yes
LACC1	chr13:44410488-44468068	5.11635	17.5436	3.42893	0.0179995	yes
CECR2	chr22:17956627-18037841	1.19308	4.09801	3.43482	0.0198396	yes
ANKRD65	chr1:1353799-1363352	12.3346	42.6819	3.46034	0.0275875	yes
CLN8	chr8:1711869-1734898	4.33018	15.0166	3.46789	0.00911455	yes
LOC150622	chr2:6072789-6121150	4.09547	14.2198	3.47208	0.00278475	yes
LAYN	chr11:111411232-111432547	4.78012	16.6015	3.47303	0.0194596	yes
CRTC3	chr15:91073197-91188577	5.66121	19.6649	3.47362	0.00346917	yes
PROX1	chr1:214161161-214214592	1.35251	4.7152	3.48626	0.0266699	yes
-	chr6:80774249-80777825	7.73908	27.0212	3.49153	0.00186271	yes
ZFP36	chr19:39897486-39900045	9.07398	31.7267	3.49645	0.0103912	yes
CDH19	chr18:64168186-64271382	1.70209	5.96212	3.50282	0.0370268	yes
RNF125	chr18:29598444-29653154	0.95113	3.34685	3.51881	0.0242739	yes
-	chr7:66365781-66374575	0.561714	1.97827	3.52185	0.0318671	yes
TRIM62	chr1:33610914-33647671	3.0752	10.8873	3.54036	0.0280099	yes
CD55	chr1:207494767-207534311	6.54774	23.2081	3.54444	0.0429465	yes
DOCK10	chr2:225629798-225907330	9.18283	32.6128	3.5515	0.038711	yes
OPALIN	chr10:98102875-98119092	35.3078	125.401	3.55165	0.0179995	yes
TMEM144	chr4:159131400-159176439	37.4451	133.137	3.55553	0.00465845	yes
FAAH	chr1:46859938-46884415	14.0983	50.1532	3.55739	0.0113855	yes
FAM53B,METTL10	chr10:126307862-126480439	13.5487	48.2086	3.55817	0.0444617	yes
ARRDC4	chr15:98503758-98517081	6.75158	24.0612	3.56379	0.00862947	yes
USP54	chr10:75257021-75351149	14.9477	53.2715	3.56386	0.00668236	yes
SPTLC2	chr14:77972337-78083110	9.03727	32.2183	3.56505	0.00988294	yes
MAFK	chr7:1570367-1596066	16.7616	59.8166	3.56867	0.00793916	yes
EEPD1	chr7:36192835-36341152	2.35801	8.45739	3.58666	0.0427133	yes
ACSL1	chr4:185676743-185747215	15.0128	54.0146	3.5979	0.00633417	yes
CTNNA3	chr10:67672203-69455949	2.91579	10.5286	3.61089	0.0305395	yes
DGKD	chr2:234263152-234380745	3.11419	11.2667	3.61786	0.0190248	yes
ANP32B	chr9:100745488-100778224	52.3874	190.3	3.63255	0.0361536	yes
SLC25A13	chr7:95749531-95951459	2.97419	10.817	3.63696	0.030511	yes
TMEM151A	chr11:66059372-66068196	26.3789	96.1504	3.64497	0.00980484	yes
HIP1	chr7:75162477-75368283	9.09862	33.2713	3.65674	0.00897489	yes
DHCR24	chr1:55315298-55352921	48.1229	176.816	3.67426	0.0355764	yes
TGFA	chr2:70674410-70781147	3.32453	12.2488	3.68437	0.0142494	yes
-	chr4:145664156-145666520	9.19725	33.9446	3.69073	0.00153782	yes
RNF130	chr5:179338597-179499122	43.1777	159.362	3.69084	0.0207648	yes
FGFR2	chr10:123237843-123357972	19.3079	71.3951	3.69771	0.0201729	yes
ATP11A	chr13:113344642-113541482	3.42621	12.6899	3.70377	0.00117618	yes
STMN4	chr8:27088450-27116114	89.9179	333.775	3.712	0.0212456	yes
ARHGEF37	chr5:148961090-149014529	9.57336	35.6571	3.72462	0.0137749	yes
SPATA13	chr13:24734860-24881212	5.0564	18.8501	3.72797	0.00140001	yes
FAM107B	chr10:14560552-14816896	25.2268	94.2456	3.73593	0.010728	yes
UGT8	chr4:115519508-115599503	23.6732	88.8345	3.75253	0.00966086	yes
ARHGAP23	chr17:36575573-36669155	24.5415	92.4964	3.76898	0.0224055	yes
CYR61	chr1:86046443-86049648	4.36044	16.4399	3.77024	0.019892	yes
JUP	chr17:39910858-39942964	6.53137	24.7398	3.78784	0.0142179	yes
PIDD	chr11:799178-806100	7.31937	27.7676	3.79371	0.0171938	yes
ENPP6	chr4:185006987-185139114	2.5434	9.65373	3.7956	0.0126559	yes
TMTC2	chr12:83080755-83533292	5.13392	19.4875	3.79583	0.00949863	yes
SLCO3A1	chr15:92396937-92715667	14.9597	57.0161	3.81131	0.0365801	yes
-	chr17:40684883-40686961	3.41316	13.0113	3.8121	0.0128251	yes
NUDT1	chr7:2281856-2290780	8.17902	31.1836	3.81263	0.0373204	yes
C1orf198	chr1:230972864-231005335	24.2573	92.5756	3.8164	0.0266085	yes
CHST3	chr10:73724119-73773524	2.66488	10.1758	3.81848	0.00467053	yes
PLXNA3	chrX:153686622-153702044	2.38229	9.09937	3.81959	0.0105672	yes
RNH1	chr11:494511-507283	38.9655	149.563	3.83834	0.0143474	yes
MID1IP1	chrX:38660684-38665783	41.6504	160.421	3.85161	0.010947	yes
CUEDC1	chr17:55938993-55980750	12.9272	49.8345	3.85501	0.0141153	yes
HMOX1	chr22:35777059-35790207	5.13109	19.8305	3.86477	0.0129327	yes
GLIPR2	chr9:36136527-36163907	6.97272	27.0098	3.87364	0.0362098	yes
IFIT3	chr10:91087601-91102472	4.30844	16.7908	3.89719	0.0072657	yes
PIK3C2B	chr1:204391756-204463837	6.27638	24.6019	3.91976	0.0205992	yes
TRIM59	chr3:160153290-160167626	2.62923	10.3702	3.9442	0.0104419	yes
RASSF2	chr20:4760666-4804291	28.3304	111.793	3.94604	0.0247323	yes
-	chr6:136656856-136660410	6.70982	26.4904	3.948	0.000493195	yes
IPO13	chr1:44412477-44433694	35.4261	140.018	3.9524	0.029332	yes
JAM3	chr11:133938819-134021652	22.2506	88.0744	3.95829	0.00228674	yes
-	chr5:69288475-69289768	2.91355	11.5517	3.96482	0.0304833	yes
SH3PXD2B	chr5:171760502-171881527	1.68807	6.69704	3.96728	0.00175186	yes
ARRDC2	chr19:18111943-18144407	15.649	62.2739	3.97942	0.00450187	yes
FZD5	chr2:208627309-208634143	0.532744	2.12506	3.9889	0.0255976	yes
AFMID	chr17:76183354-76203784	22.7683	91.2447	4.00753	0.0238096	yes
FAM102A	chr9:130701844-130742812	28.1469	112.973	4.01369	0.00518975	yes
SGK1	chr6:134490383-134639196	19.7201	79.6576	4.03941	0.00609133	yes
MAP3K11	chr11:65365153-65381720	17.5655	71.0411	4.04435	0.0172545	yes
ARHGEF1	chr19:42387266-42411604	13.3331	54.075	4.0557	0.00430554	yes
GREM1	chr15:33010204-33026870	4.62212	18.7798	4.06303	0.00261451	yes
-	chr20:21479732-21487038	2.45167	9.99542	4.07698	0.0419893	yes
PSRC1	chr1:109822175-109825790	22.74	92.9097	4.08574	0.00186271	yes
SUV420H2	chr19:55851067-55859836	2.49867	10.212	4.08697	0.0295876	yes
CLMN	chr14:95648127-95786245	3.39039	13.8687	4.09059	0.000678721	yes
FCHO1	chr19:17858526-17899377	17.1462	70.2282	4.09585	0.0149681	yes
TMEM206	chr1:212537815-212588267	8.85261	36.3765	4.10913	0.00218362	yes
LZTS2	chr10:102756863-102790914	20.0085	82.2775	4.11213	0.0195608	yes
ADM	chr11:10326631-10328946	4.89361	20.1377	4.1151	0.0320007	yes
DOHH	chr19:3490818-3500938	17.1516	71.3332	4.15898	0.00332576	yes
SEMA4C	chr2:97525472-97535735	9.90699	41.2299	4.1617	0.00288531	yes
-	chr15:101389940-101396621	0.399896	1.6659	4.16583	0.0319416	yes
SLC44A1	chr9:108004677-108202819	39.6528	165.791	4.18107	0.0207393	yes
LMNA	chr1:156084460-156109878	15.7813	66.005	4.18248	0.00421307	yes
-	chr13:39661570-39671671	0.65638	2.74622	4.18389	0.00506293	yes
KCNH8	chr3:19189960-19577915	3.82637	16.0139	4.18514	0.00798939	yes
CBR1	chr21:37406784-37498938	69.2509	290.793	4.19912	0.00288097	yes
SUN2	chr22:39130718-39152024	51.9757	218.613	4.20606	0.0427491	yes
-	chr11:119947449-119972548	0.382095	1.60835	4.20929	0.015776	yes
-	chr1:43833831-43840014	1.022	4.30709	4.21437	0.0105672	yes
LSS	chr21:47608359-47648738	19.5539	82.7285	4.23079	0.00779958	yes
WIPF1	chr2:175424161-175547627	5.55111	23.4962	4.2327	0.00174065	yes
ST18	chr8:53023270-53322506	6.19863	26.2928	4.24171	0.00535083	yes
TMC7	chr16:18995255-19075485	2.37668	10.0933	4.24681	0.0118288	yes
PMP22	chr17:15130242-15168644	36.5534	155.353	4.25003	0.0120657	yes
ASPA	chr17:3377403-3406885	10.7733	45.9603	4.26613	0.0479503	yes
ADARB2	chr10:1223193-1779670	10.9355	46.6832	4.26896	0.0419893	yes
ARHGAP22	chr10:49654033-49864310	6.64736	28.3927	4.27127	0.015123	yes
SH3TC2	chr5:148361419-148442737	1.17826	5.03653	4.27455	0.00108393	yes
ZDHHC9	chrX:128937263-128977910	13.8968	59.407	4.27487	0.00174146	yes
GALNTL2	chr3:16215868-16273456	8.88895	38.0559	4.28126	0.00377698	yes
SHROOM4	chrX:50329650-50557292	2.12841	9.13951	4.29406	0.00462743	yes
SPSB1	chr1:9352940-9429590	2.68284	11.5266	4.29642	0.00321638	yes
DNAH17	chr17:76374734-76573476	2.64606	11.4054	4.31033	0.022658	yes
CD14	chr5:140011312-140013286	7.18999	31.0381	4.31685	0.0172159	yes
NPC1	chr18:21083461-21166942	18.9258	81.6999	4.31685	0.0132989	yes
DOCK5	chr8:25042286-25273251	5.22667	22.5718	4.31858	0.000775223	yes
RASGRP3	chr2:33661415-33792287	4.37242	18.8952	4.32145	0.00167473	yes
SOCS3	chr17:76352858-76356158	2.36036	10.2045	4.32328	0.0108254	yes
-	chr20:52552273-52557771	2.78645	12.0735	4.33293	0.0012894	yes
CNTNAP4	chr16:76311175-76593135	9.76806	42.3596	4.33654	0.000377258	yes
CSF1	chr1:110453232-110473616	4.63895	20.1828	4.35073	0.0055357	yes
-	chr16:90232592-90234755	1.1812	5.14081	4.35219	0.0399102	yes
HPN	chr19:35531409-35597356	3.56818	15.5705	4.36371	0.0444519	yes
SHROOM1	chr5:132157832-132166590	6.53481	28.5166	4.3638	0.00119501	yes
CD9	chr12:6309481-6347437	49.8297	219.445	4.4039	0.000218058	yes
-	chr2:210043716-210043995	26.4229	116.368	4.40406	0.0255976	yes
GAB2	chr11:77899857-78128868	15.5917	68.7091	4.40677	0.0368015	yes
UNC13D	chr17:73823112-73840971	1.55755	6.87193	4.41201	0.00556095	yes
LINC00263	chr10:102133332-102148114	16.2025	71.498	4.41278	0.00288	yes
CYB5R2	chr11:7686325-7696290	8.78993	38.8331	4.41791	0.0104723	yes
AMOTL2	chr3:134074189-134093673	8.62347	38.1783	4.42725	0.000606248	yes
LITAF	chr16:11641577-11681322	16.8581	75.3233	4.46808	0.000322855	yes
ITFG3	chr16:284800-316119	9.27687	41.5952	4.48375	0.00081193	yes
FRMD4B	chr3:69218514-69591713	3.94571	17.7508	4.49876	0.000714794	yes
TJP2	chr9:71736179-71870124	11.1477	50.2888	4.51114	0.000720322	yes
LOC100505806	chr5:9546311-9550409	1.05347	4.75553	4.51416	0.0476643	yes
ANLN	chr7:36363758-36493400	21.6283	97.7796	4.52091	0.00275498	yes
FOLH1B	chr11:89391904-89431886	1.56025	7.08572	4.5414	0.019892	yes
LINC00256B	chr9:115867002-115873957	0.292906	1.33233	4.54866	0.0366652	yes
MAP6D1	chr3:183533663-183543393	24.6197	112.145	4.55509	0.000447094	yes
TRPM6	chr9:77337410-77503010	0.870854	3.97326	4.56249	0.0460174	yes
ATP10B	chr5:159990126-160279219	1.322	6.04819	4.57503	0.00553195	yes
ZNF488	chr10:48355088-48373866	5.24902	24.1343	4.59787	0.000362021	yes
FOLH1	chr11:49168186-49230222	9.76427	44.9594	4.60448	0.000645232	yes
MYO1E	chr15:59428071-59665071	2.74819	12.6587	4.6062	0.00411936	yes
GLTP	chr12:110288737-110318293	23.6671	109.208	4.61434	0.000561557	yes
TBC1D2	chr9:100961037-101018003	3.33307	15.3853	4.61595	0.0134272	yes
GPR37	chr7:124382082-124406111	22.6737	104.664	4.6161	0.00197619	yes
TMTC4	chr13:101255884-101327103	8.01266	37.1427	4.6355	0.00165094	yes
KIAA1755	chr20:36838757-36917286	4.82722	22.478	4.65651	0.0117184	yes
LOC729234	chr2:96676298-96700852	20.5053	95.754	4.66972	0.0281629	yes
CERS2	chr1:150937648-150947479	38.7362	181.53	4.68631	0.00176118	yes
GUSBP9	chr5:70516052-70555122	2.72111	12.7983	4.70334	0.04346	yes
KIF13B	chr8:28924793-29120613	8.17108	38.4476	4.70533	0.00607103	yes
CLDN15	chr7:100875372-100882235	2.84499	13.4012	4.71046	0.0430172	yes
PAQR4	chr16:3019341-3030540	23.4712	110.684	4.71574	0.000156622	yes
SLC31A2	chr9:115913237-115926538	18.1202	85.5455	4.721	0.000123297	yes
-	chr2:232549772-232554655	0.356241	1.68281	4.7238	0.0438992	yes
TK1	chr17:76170159-76183285	0.918749	4.3632	4.74907	0.049387	yes
CPNE2	chr16:57126454-57181878	14.8263	70.6582	4.76573	0.000134285	yes
P2RX7	chr12:121570621-121630576	5.82074	27.7507	4.76756	0.0068085	yes
TMCC3	chr12:94960899-95211930	2.54817	12.2015	4.78834	0.0169462	yes
PLIN2	chr9:19108435-19131253	5.46779	26.1818	4.78837	0.00576764	yes
HK2	chr2:75059781-75120481	0.687486	3.31487	4.82173	0.0174076	yes
FAM124A	chr13:51796469-51858476	5.24529	25.4156	4.84541	0.000246874	yes
RNASE1	chr14:21269514-21271036	154.972	753.301	4.86088	0.000937381	yes
NACAD	chr7:45120035-45128493	16.1018	78.7624	4.89153	0.000164371	yes
UNC5B	chr10:72972291-73062638	7.40425	36.2512	4.896	0.00164069	yes
-	chr11:10844889-10848315	0.449908	2.20673	4.90485	0.0288808	yes
LLGL2	chr17:73521782-73571291	1.85639	9.12048	4.91302	0.0230149	yes
EFS	chr14:23822261-23835640	11.6786	57.4856	4.9223	0.000318564	yes
CYP27A1	chr2:219646471-219680016	14.9648	74.3009	4.96504	3.78114e-05	yes
-	chr15:75614457-75614912	26.4547	131.895	4.98569	0.000764641	yes
NMB	chr15:85198359-85201828	4.54761	22.735	4.99933	0.0185141	yes
-	chr7:45844735-45851643	0.272734	1.37284	5.03362	0.0349115	yes
SOX8	chr16:1031807-1036985	27.8412	140.277	5.03847	0.00139113	yes
-	chr17:20688100-20689217	4.20924	21.2385	5.04569	0.00341644	yes
-	chr20:11869451-11871376	0.534665	2.71615	5.0801	0.0430996	yes
COL9A2	chr1:40765615-40783338	20.6686	105.204	5.09004	0.00174938	yes
SYNGR2	chr17:76164670-76169009	19.0916	97.2876	5.09583	0.000840048	yes
COL4A5	chrX:107683073-107940775	6.9437	35.579	5.12393	0.000474529	yes
CDR2L	chr17:72983726-73001893	7.03372	36.1774	5.14342	0.000172976	yes
-	chr15:101401803-101419159	1.41704	7.31071	5.15914	0.0119853	yes
LLGL1	chr17:18128935-18162230	13.8367	71.4882	5.16656	0.00157464	yes
SLC16A3	chr17:80186281-80197375	2.41652	12.5489	5.19296	0.0200136	yes
RTKN	chr2:74652987-74669060	20.5604	107.042	5.20622	0.00018003	yes
HSD17B3,SLC35D2	chr9:98997344-99145992	6.54861	34.135	5.21256	0.0280601	yes
MARCKSL1	chr1:32799431-32801834	156.091	816.98	5.234	0.00316022	yes
-	chr5:34163772-34171363	0.320932	1.68145	5.23927	0.00860766	yes
PLEKHH1	chr14:68000007-68067017	23.8204	124.966	5.24618	0.000404205	yes
FCGBP	chr19:40353961-40440945	1.8932	9.96193	5.26195	0.0158913	yes
EFNA1	chr1:155100348-155107386	10.1717	53.8147	5.29063	0.000722	yes
FOS	chr14:75745480-75748937	12.6693	67.0497	5.2923	9.94634e-05	yes
HMGA1P7	chr6:134432762-134438818	0.276574	1.47525	5.33402	0.0233471	yes
SLC6A9	chr1:44457279-44507044	7.0708	37.7274	5.33566	0.0473919	yes
CDC42EP2	chr11:65082288-65089900	6.04569	32.4513	5.36768	8.80943e-05	yes
ZNF536	chr19:30716540-31204580	7.5091	40.4839	5.39131	0.00461866	yes
EFHD1	chr2:233470766-233547526	76.474	415.18	5.42903	0.00779958	yes
DAPK2	chr15:64199232-64338551	2.84499	15.5422	5.46301	0.00405605	yes
LOC400940	chr2:6122109-6128364	0.451887	2.49485	5.52096	0.0129166	yes
-	chr11:18210559-18210816	13.971	77.1533	5.52239	0.0146704	yes
PDE6B	chr4:619362-664681	5.00751	27.6837	5.52844	0.000252668	yes
CAPN3	chr15:42651697-42704515	51.0107	282.48	5.53766	4.62186e-05	yes
DYSF	chr2:71680752-71913935	18.8349	104.608	5.55395	0.00203212	yes
SPP1	chr4:88896801-88904563	105.713	587.269	5.55531	0.00245197	yes
RRAD	chr16:66955581-66959447	1.18734	6.61343	5.56995	0.040987	yes
-	chr3:147663203-147667828	0.252473	1.41273	5.59557	0.0201819	yes
SELL	chr1:169659805-169680843	0.792244	4.43946	5.60365	0.0259161	yes
TMEM98	chr17:31254927-31277905	15.2859	85.828	5.61485	6.30415e-05	yes
APLNR	chr11:57001051-57004927	9.8177	55.1635	5.61878	0.000299529	yes
PIEZO2	chr18:10669891-11149141	1.63162	9.23859	5.66222	0.000600079	yes
RHOG	chr11:3848199-3862213	19.9848	113.323	5.67046	1.51068e-05	yes
LOC283547	chr14:39213554-39417429	0.923394	5.23822	5.67279	0.0409916	yes
-	chr19:47139032-47142453	0.665947	3.77891	5.67449	0.00578269	yes
TFEB	chr6:41650094-41703997	8.56529	48.9865	5.71919	0.00260972	yes
RBP7	chr1:10057254-10076079	7.63885	43.9738	5.7566	0.00279895	yes
LGALS3BP	chr17:76967334-76976064	24.2807	139.856	5.75997	3.9801e-05	yes
-	chr17:79348993-79359315	4.66643	27.072	5.80144	0.0293085	yes
ANGPTL2	chr9:129677052-129985469	3.01844	17.518	5.80366	0.0479503	yes
TTYH2	chr17:72209695-72258157	31.5067	183.804	5.83381	9.62729e-05	yes
PTK6	chr20:62159775-62168723	1.74577	10.2018	5.84373	0.0119021	yes
MOG	chr6:29624757-29640149	8.33271	49.0835	5.89046	0.000313549	yes
CDC20	chr1:43824625-43828873	0.437663	2.60355	5.94876	0.0440135	yes
TJAP1	chr6:43445260-43474294	12.5754	74.9966	5.96375	0.000225146	yes
PRR5L	chr11:36317724-36486754	2.2547	13.4646	5.97179	0.000423186	yes
TMPRSS5	chr11:113558266-113577110	10.2221	61.2825	5.9951	0.00386799	yes
PRR18	chr6:166718069-166732419	10.3348	62.3956	6.03743	1.70347e-05	yes
PLLP	chr16:57290008-57318584	60.7934	367.699	6.04834	1.05849e-05	yes
VWA1	chr1:1370300-1432479	11.9905	72.5945	6.05433	0.00114715	yes
TMEM235	chr17:76226636-76248919	17.211	104.289	6.05944	0.00552156	yes
-	chr8:143171236-143173126	2.64162	16.0359	6.07048	0.0251366	yes
TYMS	chr18:596997-712662	3.88625	23.6281	6.07992	0.0414986	yes
PIRT	chr17:10725791-10741418	0.848839	5.17693	6.09884	0.00361087	yes
-	chr1:1363502-1369787	27.9666	170.837	6.10861	1.16837e-05	yes
GLDN	chr15:51633712-51700551	7.22779	44.2104	6.11672	0.000493538	yes
DBNDD2,SYS1	chr20:43990576-44039250	253.854	1565.64	6.16748	0.0310265	yes
ERBB3	chr12:56473808-56497416	12.1185	75.2661	6.21084	0.00884579	yes
PLIN3	chr19:4838345-4867780	8.37116	52.3567	6.25441	9.90072e-06	yes
SEMA4D	chr9:91975705-92112894	19.1421	119.956	6.26661	0.00306321	yes
C12orf34	chr12:110151874-110211292	7.40137	46.6857	6.30771	6.48021e-06	yes
-	chr7:142631454-142634477	0.332074	2.09495	6.30868	0.0196261	yes
CRYAB	chr11:111779349-111797595	641.539	4057.05	6.32393	0.0259118	yes
-	chr3:16285311-16289724	0.18744	1.18577	6.32613	0.0263055	yes
TPPP3	chr16:67423710-67427421	64.8083	411.628	6.35147	2.03054e-05	yes
CNTN2	chr1:205012339-205047369	35.3577	224.918	6.36122	0.00136086	yes
ELOVL1	chr1:43829067-43833745	34.3094	218.524	6.36922	2.40831e-05	yes
SEMA3B	chr3:50305039-50314572	26.337	167.787	6.37077	8.36633e-06	yes
MYO1D	chr17:30819614-31203911	5.03445	32.1487	6.38574	3.26426e-05	yes
GPD1	chr12:50497800-50505095	3.37054	21.5428	6.3915	1.13205e-05	yes
CDK18	chr1:205473683-205502053	35.3598	227.175	6.42467	0.000125889	yes
CLDN11	chr3:170136652-170152479	37.0306	238.334	6.43614	1.97595e-05	yes
PHLDB1	chr11:118477212-118528748	30.7772	199.822	6.49253	0.00149153	yes
IP6K3	chr6:33689328-33714762	1.55982	10.1275	6.49274	0.0147012	yes
SOX10	chr22:38302154-38437918	20.4556	133.049	6.50428	0.0450965	yes
-	chr9:38544686-38545269	2.2316	14.5332	6.51246	0.0129163	yes
KEL	chr7:142638019-142736551	1.11952	7.30328	6.52358	0.04274	yes
ATF3	chr1:212738675-212794119	3.74897	24.5529	6.54924	0.000633837	yes
PLXNB3	chrX:153029650-153044801	10.8063	71.265	6.59476	2.96146e-06	yes
ABCA2	chr9:139901685-139931234	57.7726	382.958	6.62871	0.00737735	yes
SFRP1	chr8:41119475-41166990	4.22136	28.0632	6.6479	5.65302e-07	yes
GAL3ST1	chr22:30950619-30970529	6.15286	41.0321	6.66878	0.000107928	yes
LDLRAP1	chr1:25870075-25896768	6.89976	46.1045	6.68204	4.12403e-05	yes
TMEM125	chr1:43735664-43739673	13.0245	87.0856	6.68629	0.000188332	yes
HSPA2	chr14:65007185-65009954	42.6317	287.338	6.74001	3.62145e-06	yes
PI16	chr6:36916038-36932613	5.18547	35.0815	6.76535	0.00274548	yes
HN1L	chr16:1728270-1752074	4.18566	28.8047	6.88176	3.70261e-06	yes
LGR5	chr12:71833458-71980084	1.02733	7.09523	6.90648	0.0133134	yes
TSPAN8	chr12:71518876-71551927	1.49263	10.4119	6.97554	0.021043	yes
GIPR	chr19:46171501-46186976	0.603612	4.24859	7.03861	0.0135205	yes
CPAMD8	chr19:17003761-17137625	0.554265	3.92228	7.07654	0.00310278	yes
TF	chr3:133464976-133497850	175.299	1248.22	7.12052	0.00560292	yes
SGK2	chr20:42187634-42216951	2.16128	15.5027	7.17293	0.00378042	yes
PPAP2C	chr19:281043-291435	13.7064	98.6352	7.19629	7.81346e-06	yes
-	chr11:94819408-94822755	0.183099	1.32029	7.2108	0.0240141	yes
SLC11A1	chr2:219246751-219261617	1.62457	11.723	7.21606	0.0201729	yes
GJC2	chr1:228337414-228347527	7.88551	57.9386	7.34748	4.55692e-07	yes
LOC100133050	chr5:99711274-99723958	1.92913	14.1903	7.3558	0.0256401	yes
ICOSLG	chr21:45642367-45660878	5.54065	40.7919	7.3623	4.12403e-05	yes
LDB3	chr10:88426446-88499603	7.04038	51.8657	7.36689	0.000871449	yes
TMC6	chr17:76108998-76139049	8.49028	62.8111	7.398	3.66894e-06	yes
BOK	chr2:242483800-242519109	31.2834	231.448	7.39843	1.42822e-05	yes
ELN	chr7:73441937-73484236	0.667647	4.97307	7.44865	0.000969809	yes
CD44	chr11:35160416-35253949	2.92822	22.0695	7.53683	0.000211973	yes
ELK4,SLC45A3	chr1:205576731-205649630	5.14467	38.9133	7.56381	0.00199046	yes
ADAMTS14	chr10:72432558-72522195	1.25771	9.56769	7.60723	0.00498839	yes
NINJ2	chr12:673461-772982	7.82384	59.5296	7.60874	0.000266739	yes
DFNB31	chr9:117164356-117267736	7.98057	61.1043	7.65663	0.00181891	yes
LIPE	chr19:42905657-43156481	6.77776	52.0322	7.6769	1.05819e-05	yes
-	chr5:151986384-151988840	0.247872	1.91076	7.70866	0.0402485	yes
PPP1R14A	chr19:38741876-38747231	59.3483	458.167	7.71997	1.60858e-07	yes
CMTM5	chr14:23845640-23849127	23.5319	184.056	7.82155	1.46542e-05	yes
-	chr4:115658632-115664555	0.109013	0.862387	7.91086	0.012718	yes
CDC42EP1	chr22:37946042-37965416	19.979	158.218	7.91922	4.44214e-06	yes
HSPA6	chr1:161494035-161496687	0.700717	5.55208	7.92343	0.00152971	yes
TSPAN15	chr10:71211225-71267423	12.5259	99.7926	7.9669	6.88262e-06	yes
GALNT6	chr12:51745405-51785409	1.35681	10.8221	7.97614	5.68066e-05	yes
AQP1	chr7:30951414-30965131	20.0753	161.22	8.03076	0.000227694	yes
MAL	chr2:95691478-95720679	68.0608	546.616	8.03129	0.0139824	yes
-	chrX:118052530-118053665	0.414389	3.34222	8.06542	0.0286056	yes
HSPA1B	chr6:31795511-31798031	18.5467	150.624	8.12134	1.66911e-08	yes
NKX6-2	chr10:134351352-134599537	32.995	270.518	8.19876	0.0117318	yes
S1PR5	chr19:10623417-10628668	7.4035	60.9238	8.22905	2.97585e-07	yes
CA14	chr1:150229690-150237480	2.74207	22.659	8.26347	0.000286619	yes
PCSK6	chr15:101836917-102030448	7.46714	62.5413	8.37554	0.00284344	yes
GPIHBP1	chr8:144295067-144299044	5.81263	48.7435	8.38579	1.59293e-06	yes
MAG	chr19:35782988-35804709	62.8597	530.705	8.44269	1.59777e-05	yes
-	chr17:56032687-56033544	0.548935	4.6431	8.45838	0.0256522	yes
CDKN1C	chr11:2894777-2906995	9.53659	80.9146	8.48465	6.71152e-05	yes
C11orf9	chr11:61520120-61555989	22.7004	192.718	8.48963	1.02179e-06	yes
-	chr11:119846476-119891096	0.237471	2.01621	8.49034	0.00372411	yes
-	chr15:30336883-30338277	0.249288	2.12958	8.54265	0.0365381	yes
ADAMTS18	chr16:77316024-77469011	0.100771	0.872823	8.66145	0.0468596	yes
-	chr9:38540558-38544539	5.38366	47.9564	8.90777	1.51068e-05	yes
SERPINE1	chr7:100770378-100782547	0.796166	7.12611	8.95053	0.00199046	yes
CCDC114	chr19:48799708-48824037	0.256351	2.30118	8.97668	0.033235	yes
CD22	chr19:35820071-35838264	9.06232	81.6958	9.01489	3.53508e-07	yes
-	chr2:240361333-240370291	0.169126	1.52686	9.02794	0.00047684	yes
FAM125B	chr9:129089122-129269492	3.66817	33.1512	9.03753	0.0159513	yes
PRIMA1	chr14:94184625-94254864	2.68599	24.288	9.04248	0.000232884	yes
-	chr8:27073791-27079895	0.103542	0.937847	9.05765	0.0143474	yes
HSPA1A	chr6:31783290-31785719	18.0896	163.873	9.05896	3.23923e-09	yes
CARNS1	chr11:67183148-67193511	31.2211	286.19	9.16656	7.24757e-06	yes
ADAMTS4	chr1:161153394-161169032	3.02689	27.7631	9.17215	3.48131e-06	yes
FA2H	chr16:74746855-74808729	18.4479	170.282	9.23043	8.83431e-08	yes
NGFR	chr17:47572654-47592382	0.955021	8.87961	9.29782	0.000125292	yes
-	chr9:115510951-115512836	0.172489	1.60508	9.3054	0.0498193	yes
-	chr15:30325992-30331977	0.093229	0.882686	9.46793	0.0212646	yes
FLNC	chr7:128470482-128499328	1.65986	16.1621	9.73703	5.05805e-06	yes
KLK6,KLK8	chr19:51461884-51504958	31.4652	307.65	9.77747	1.03841e-06	yes
-	chr14:23170557-23172376	0.27244	2.69241	9.88258	0.0088751	yes
SLC5A11	chr16:24849961-24922946	9.06844	90.3929	9.96786	7.18945e-06	yes
LOC100271702	chr12:2038367-2045742	0.341679	3.40805	9.97442	0.00276682	yes
-	chr3:170156972-170164808	0.131896	1.31744	9.98848	0.000910198	yes
STC1	chr8:23699433-23712320	0.181836	1.8394	10.1157	0.00584765	yes
SLC4A9	chr5:139739786-139754722	0.107018	1.09364	10.2192	0.0301311	yes
RGS1	chr1:192544856-192549159	3.21061	34.3136	10.6876	0.000177685	yes
PTPRH	chr19:55692614-55720874	0.553785	6.01291	10.8578	0.00356803	yes
-	chr14:36558213-36561993	0.282851	3.11412	11.0098	0.00263491	yes
CHI3L2	chr1:111770280-111786062	2.90193	32.3207	11.1377	0.000417691	yes
-	chr12:51785564-51788746	0.166464	1.85412	11.1383	0.0041984	yes
LRP2	chr2:169983618-170219122	1.43262	16.7662	11.7032	0.0257187	yes
SERPINA3	chr14:95078713-95090390	14.853	177.295	11.9366	1.92675e-06	yes
-	chr10:134609129-134611207	0.232673	2.79337	12.0056	0.0241567	yes
USH1C	chr11:17515441-17565963	3.42143	41.3605	12.0887	0.000104632	yes
-	chr6:3580955-3582650	0.197901	2.51879	12.7275	0.0153965	yes
DMRTA2	chr1:50883222-50889119	0.0951336	1.30462	13.7136	0.0248543	yes
RAB42	chr1:28918610-28923117	0.199339	2.92754	14.6862	0.006082	yes
ADRA2B	chr2:96778622-96781888	0.149496	2.24694	15.0301	0.00135268	yes
TNC	chr9:117781853-117880536	0.64872	10.2732	15.8361	0.000607495	yes
-	chr7:73438798-73441736	0.0925909	1.55497	16.794	0.00788927	yes
LTF	chr3:46477495-46506598	0.520221	12.5738	24.1701	4.13978e-06	yes
FFAR3	chr19:35849487-35851389	0.0459175	1.13566	24.7326	0.0496471	yes
-	chr6:134950751-134953648	0.030388	0.934131	30.7401	0.0239791	yes
-	chr17:48964967-48971006	0.0364359	1.18023	32.392	0.0345805	yes
DAO	chr12:109273856-109294710	0.180005	6.11662	33.9803	0.000196888	yes
-	chr5:72539624-72570945	0.0833172	2.88574	34.6356	0.0163335	yes
SERPINA5	chr14:95047730-95059457	0.0486903	1.87777	38.5656	0.00467642	yes
LINC00162	chr21:46419126-46424642	0.0968483	5.6667	58.5111	0.00926851	yes
CCDC19	chr1:159842153-159869906	0.0212159	1.35457	63.8469	0.0248006	yes
-	chr7:73380799-73382120	0.0201173	1.58368	78.7223	0.04031	yes
SLC47A2	chr17:19581627-19620104	0.0592195	4.7187	79.6815	0.00109939	yes
All genes that were considered differentially expressed are shown here.
The genes were ranked by fold-change. A negative fold-change represents up-regulation in GM.
Novel genes are represented by the "-" sign.
